13

## Abstract

14

15

16

17

18

19

20

21

22

23

24

25

When listening to speech, brain responses time-lock to acoustic events in the stimulus. Recent studies have also reported that cortical responses track linguistic representations of speech. However, tracking of these representations is often described without controlling for acoustic properties. Therefore, the response to these linguistic representations might reflect unaccounted acoustic processing rather than language processing. Here we tested several recently proposed linguistic representations, using audiobook speech, while controlling for acoustic and other linguistic representations. Indeed, some of these linguistic representations were not significantly tracked after controlling for acoustic properties. However, phoneme surprisal, cohort entropy, word surprisal and word frequency were significantly tracked over and beyond acoustic properties. Additionally, these linguistic representations are tracked similarly across different stories, spoken by different readers. Together, this suggests that these representations characterize processing of the linguistic content of speech and might allow a behaviour-free evaluation of the speech intelligibility.

## 26 Introduction

27 When listening to natural running speech, brain responses time-lock to certain features of the presented  
28 speech. This phenomenon is called neural tracking (for a review, see, e.g., Brodbeck and Simon, 2020).  
29 Commonly, neural tracking is studied using an acoustic representation of the speech, for example, the envelope  
30 or spectrogram (Aiken and Picton, 2008; Ding and Simon, 2012b). Neural tracking of acoustic speech  
31 representations is modulated by attention: in a two-talker scenario, higher neural tracking is observed for the  
32 attended talker compared to the ignored talker (e.g., Ding and Simon, 2012a; Horton et al., 2014; O’Sullivan  
33 et al., 2015; Das et al., 2016). It is also modulated by speech understanding: higher neural tracking is  
34 observed if the speech is intelligible (Etard and Reichenbach, 2019; Iotzov and Parra, 2019). Interestingly,  
35 neural tracking also predicts a participant’s behavioral speech-in-noise performance (Ding and Simon, 2013;  
36 Vanthornhout et al., 2018; Lesenfants et al., 2019). The observation of neural speech tracking does not  
37 guarantee speech intelligibility, however, since music (Tierney and Kraus, 2014), and the ignored talker in the  
38 two-talker scenario, are also significantly tracked by the brain (Horton et al., 2014; O’Sullivan et al., 2015;  
39 Ding and Simon, 2012a).

40 A more promising avenue of neurally predicting behavioral speech understanding comes from recent studies  
41 which reported that linguistic properties, derived from presented speech’s linguistic content, are also tracked  
42 by the brain (Broderick et al., 2018; Brodbeck et al., 2018; Weissbart et al., 2020; Koskinen et al., 2020).  
43 Neural tracking of linguistic speech representations has mainly been studied with measures that quantify  
44 the amount of new linguistic information in a word, such as word surprisal or semantic dissimilarity. These  
45 representations show a negativity with a latency of around 400 ms relative to word onset (Broderick et al.,  
46 2018; Weissbart et al., 2020; Koskinen et al., 2020) which is in broad agreement with results of studies  
47 investigating the N400 event-related brain potential (ERP)-response, an evoked brain responses to words,  
48 typically studied in carefully controlled stand-alone sentence or word paradigms (Frank et al., 2015; Frank  
49 and Willems, 2017; for a review on the N400 response, see e.g., Kutas and Federmeier, 2011 and Lau et al.,  
50 2008). Neural tracking of linguistic properties is also seen at the level of phonemes (Brodbeck et al., 2018;  
51 Gwilliams and Davis, 2020; Donhauser and Baillet, 2020). Several studies investigating neural tracking of  
52 linguistic representations report an absence of corresponding responses to the ignored speaker in a two-talker  
53 speech mixture, suggesting that these linguistic speech representations might reflect speech comprehension  
54 (Brodbeck et al., 2018; Broderick et al., 2018).

55 For clinical applications it would be desirable to develop an objective measure of speech intelligibility derived  
56 from neural responses to continuous speech. Such a measure would allow for behaviour-free evaluation

57 of speech understanding; this would open doors towards better quantification of speech understanding in  
58 populations from whom obtaining behavioral measures may be difficult, such as young children or people with  
59 cognitive impairments, to allow better targeted interventions and better fitting of hearing devices. Few studies,  
60 however, analyze neural tracking of linguistic representations without controlling for the above-mentioned  
61 neural tracking of the acoustic properties of the speech (though see Brodbeck et al., 2018; Koskinen et al.,  
62 2020). This is problematic as linguistic features are often correlated with acoustic features. Indeed, Daube  
63 et al. (2019) found that acoustic features of speech can explain observed responses to different phoneme  
64 categories, when controlled for. Thus, without controlling for acoustic properties, speech tracking analysis  
65 might thus be biased to find spurious significant linguistic representations.

66 A measure of neural tracking is derived from the performance of a model, constructed to predict the neural  
67 response, either electroencephalography (EEG) or magnetoencephalography (MEG), from a number of  
68 stimulus representations. Apart from linguistic representations, it is important to additionally include lexical  
69 *segmentation* of the speech into the model. These represent the onsets of words or phonemes, as distinct from  
70 acoustic onsets, to which they are not equivalent, though correlated. Word onsets in continuous speech are  
71 associated with a characteristic brain response (Brodbeck et al., 2018; Sanders and Neville, 2003). Using  
72 novel words, Sanders et al. (2002) showed that the neural response to a word onset depends on whether  
73 or not the word is associated with a learned lexical item. Therefore, the response to lexical segmentation  
74 properties of the speech cannot be purely acoustic. In this study, we control for both acoustic and lexical  
75 segmentation properties of the speech, to identify the *added value* of a linguistic speech representation.

76 Based upon the above mentioned studies, we evaluate 3 types of linguistic speech representations that differ in  
77 the degree to which they can contribute to the understanding of the story: (a) at the phoneme level: phoneme  
78 surprisal and cohort entropy (Brodbeck et al., 2018), (b) at the word level: word surprisal, word entropy, word  
79 precision and word frequency (Weissbart et al., 2020) and (c) at the contextual level: semantic dissimilarity  
80 (Broderick et al., 2018). Firstly, we aim to verify whether the existing linguistic representations, proposed in  
81 in previous studies, are tracked after controlling for the neural tracking of acoustic and lexical segmentation  
82 properties of the presented speech. Secondly, we explore whether the processing of these linguistic speech  
83 representations is speaker- and content-specific by evaluating neural tracking across different stories. If  
84 so, these linguistic representations characterize processing of language and would allow a behaviour-free  
85 evaluation of speech intelligibility.

## 86 Materials and Methods

### 87 Participant Details

88 The EEG data of 29 young normal-hearing individuals (22 ♀) were analysed. The data were originally  
89 collected for other studies (Accou et al., 2020; Monesi et al., 2020). Participant age varied between 18 and 25  
90 years old (mean±std= 20.81 ± 1.94 years). The inclusion criteria were being a native speaker of Dutch and  
91 having normal hearing, which was verified using pure tone audiometry (octave frequencies between 125 and  
92 8000 Hz; no hearing threshold exceeded 20 dB hearing level). The medical ethics committee of the University  
93 Hospital of Leuven approved the experiments, and all participants signed an informed consent form before  
94 participating (S57102).

### 95 Experimental Procedure

#### 96 EEG Experiment

97 **Data acquisition** The EEG recording was performed in a soundproof booth with Faraday cage (at ExpORL,  
98 Dept. Neurosciences, KU Leuven) using a 64-channel BioSemi ActiveTwo system (Amsterdam, Netherlands)  
99 at a sampling frequency of 8192 Hz.

100 **Stimuli presentation** Each participant listened to five Dutch stories: De kleine zeemeermin (DKZ), De  
101 wilde zwanen (DWZ), De oude lantaarn (DOL), Anna en de vorst (AEDV) and Eline (Table 1). Stories longer  
102 than 20 minutes were divided into parts, each lasting 13 to 15 minutes (DWZ and AEDV were divided into 2  
103 parts, DKZ into 3 parts). One or two randomly selected stories or story parts were presented in noise, but  
104 for this study only participants who listened to all 3 parts of DKZ without background noise were included.  
105 Additionally, when testing the DKZ-based model on any of the other stories, only participants who listened  
106 to that story without noise were included (the resulting number of participants is summarized in Table 2).

Table 1: Details on the presented stories.

| Story                      | Author         | Speaker             | Duration (min) |
|----------------------------|----------------|---------------------|----------------|
| De kleine zeemeermin (DKZ) | H. C. Andersen | Katrien Devos (♀)   | 46.08          |
| De wilde zwanen (DWZ)      | H. C. Andersen | Katrien Devos (♀)   | 27.46          |
| De oude lantaarn (DOL)     | H. C. Andersen | Katrien Devos (♀)   | 16.02          |
| Anna en de vorst (AEDV)    | Unknown        | Wivine Decoster (♀) | 25.51          |
| Eline                      | Rascal         | Luc Nuyens (♂)      | 13.33          |

Table 2: Amount of participants used for the across story comparisons.

| DWZ part 1 | DWZ part 2 | DOL   | AEDV part 1 | AEDV part 2 | Eline |
|------------|------------|-------|-------------|-------------|-------|
| 20/29      | 19/29      | 22/29 | 15/29       | 23/29       | 23/29 |

107 The speech stimuli were presented bilaterally at 65 dB sound pressure level (SPL, A-weighted) through ER-3A  
108 insert earphones (Etymotic Research Inc, IL, USA) using the software platform APEX (Dept. Neurosciences,  
109 KU Leuven) (Francart et al., 2008).

## 110 **Signal Processing**

### 111 **Processing of the EEG signals**

112 The EEG recording with a sampling frequency of 8192 Hz was downsampled to 256 Hz to decrease the  
113 processing time. We filtered the EEG using a multi-channel Wiener filter (Somers et al., 2018) to remove  
114 artifacts due to eye blinks. We referenced the EEG to the common-average and filtered the data between 0.5  
115 and 25 Hz using a Chebyshev filter (Type II with an attenuation of 80 dB at 10% outside the passband).  
116 Then additional downsampling to 128 Hz was done.

### 117 **Extraction of the predictor variables**

118 We used speech representations for acoustic properties of the speech (spectrogram, acoustic onsets), lexical  
119 segmentation of the speech (phoneme onsets, word onsets, function word onsets and content word onsets)  
120 and linguistic properties (phoneme surprisal, cohort entropy, word surprisal, word entropy, word precision,  
121 word frequency, semantic dissimilarity). An example of these speech representations is visualized in Figure 1  
122 (for illustration purposes, only one band of the 8-band spectrogram and acoustic onsets is visualized).

123 **Spectrogram and acoustic onsets** Both of these speech representations reflect the continuous acoustic  
124 power of the presented speech stimuli. A spectrogram representation was obtained using the Gammatone  
125 Filterbank Toolkit 1.0 (Heeris (2014); frequency cut-offs at 20 and 5000 Hz, 256 filter channels and a window  
126 time of 0.01 second). This toolkit calculates a spectrogram representation based on a series of gammatone  
127 filters inspired by the human auditory system (Slaney, 1998). The resulting filter outputs with logarithmic  
128 center frequencies were averaged into 8 frequency bands (frequencies below 100 Hz were omitted similar to  
129 Brodbeck et al. (2020)). Additionally, each frequency band was scaled with exponent 0.6 (Biesmans et al.,  
130 2016) and downsampled to the same sampling frequency as the processed EEG, namely 128 Hz.

131 For each frequency band of the spectrogram, an acoustic onsets representation was computed by applying an  
132 auditory edge detection model (Fishbach et al., 2001) (using a delay layer with 10 delays from 3 to 5 ms,  
133 a saturation scaling factor of 30 and receptive field based on the derivative of a Gaussian window with a  
134 standard deviation of 2 ms (Brodbeck et al., 2020)).

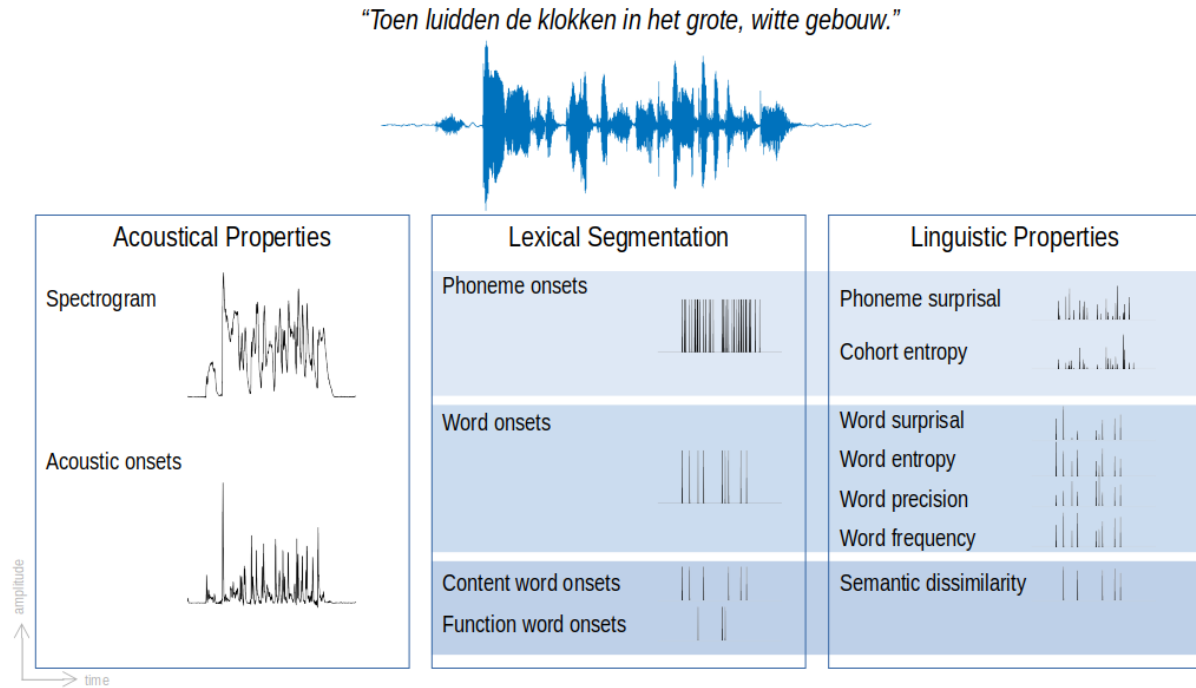

Figure 1: Speech representations used in this study. For illustration purpose, only one band of the spectrogram and acoustic onsets is visualized.

135 **Phoneme onsets and word onsets** Time-aligned sequences of phonemes and words were extracted by  
136 performing a forced alignment of the identified phonemes using the speech alignment component of the  
137 reading tutor (Duchateau et al., 2009). The resulting representations were one-dimensional arrays with  
138 impulses on the onsets of, respectively, phonemes and words.

139 **Content word onsets and function word onsets** The Stanford Parser (Klein and Manning, 2003b,a)  
140 was used to identify the part-of-speech category of each word. We subsequently classified the words into  
141 2 classes: (a) open class words, also referred to as content words, which included all adjectives, adverbs,  
142 interjections, nouns and verbs and (b) closed class words, also referred to as function words, which included  
143 all adpositions, auxiliary verbs, conjunctions, determiners, numerals, articles and pronouns. The resulting  
144 representations were one-dimensional arrays with impulses at the onsets of, respectively, content or function  
145 words.

146 **Linguistic representations at the phoneme level** Two linguistic phoneme representations were modeled  
147 to describe each phoneme’s informativeness in its lexical context, namely *phoneme surprisal* and *cohort entropy*  
148 (Brodbeck et al., 2018). Both representations are derived from the active cohort of words (Marslen-Wilson,  
149 1987): a set of words which start with the same acoustic input at a given point during the word. Phoneme

150 surprisal reflects how surprising a given phoneme is, given the previous phonemes. It is calculated as the  
151 negative logarithm of the inverse conditional probability of each phoneme given the preceding phonemes in  
152 the word. Cohort entropy reflects the degree of competition among words which are compatible with the  
153 partial phoneme string from word onset to the current phoneme. It is expressed as the Shannon entropy of  
154 the active cohort of words at each phoneme (for details of both representations, see Brodbeck et al. (2018)).  
155 The lexicon for determining the cohort was based on a custom pronunciation dictionary maintained at our lab  
156 (created manually and using grapheme-to-phoneme conversion; containing 9157 words). The prior probability  
157 for each word was based on its frequency in the SUBTLEX-NL database (Keuleers et al., 2010) (phoneme or  
158 word frequency was log-transformed using a base of 2). The initial phoneme of each word was not modeled in  
159 these representations. The resulting representations were one-dimensional arrays with impulses at phoneme  
160 onsets modulated by the value of respectively surprisal or entropy, except for the word’s initial phoneme.

$$\begin{array}{cc} \text{Phoneme surprisal} & \text{Cohort entropy} \\ \text{surprisal}_i = -\log_2\left(\frac{\text{freq}(\text{cohort}_i)}{\text{freq}(\text{cohort}_{i-1})}\right) & \text{entropy}_i = -\sum_{\text{word}}^{\text{cohort}_i} p_{\text{word}} \log_2(p_{\text{word}}) \end{array}$$

161 **Linguistic representations at the word level** Linguistic word representations were derived using a  
162 Dutch 5-gram model (Verwimp et al., 2019) to describe each word’s informativeness independent of sentence  
163 boundaries, namely *word surprisal*, *word entropy*, *word precision* and *word frequency*. N-gram models are  
164 Markov models which describe a word’s probability based on its  $n - 1$  previous words. Word surprisal was  
165 calculated as the negative logarithm of the conditional probability of the considered word given the 4 preceding  
166 words. Word entropy is the Shannon entropy of the word given the 4 preceding words. Word precision was  
167 defined as the inverse of the word entropy. Word frequency was included as the negative logarithm of the  
168 word’s unigram probability. Note that some of the methods differ slightly between phoneme- and word-level  
169 representations; we opted to use representations as close as possible to those used previously in the literature.  
170 The resulting representations were one-dimensional arrays with impulses at word onsets modulated by the  
171 value of, respectively, surprisal, entropy, precision or word frequency.

$$\begin{array}{cc} \text{Word surprisal} & \text{Word frequency} \\ \text{surprisal}_i = -\log_{10}(p(w_i|w_{i-5}, \dots, w_{i-1})) & \text{frequency}_i = -\log_{10}(p(w_i)) \\ \\ \text{Word entropy} & \text{Word precision} \\ \text{entropy}_i = -\sum_w^{\text{all words}} p(w|w_{i-5}, \dots, w_{i-1}) \log_{10}(p(w|w_{i-5}, \dots, w_{i-1})) & \text{precision}_i = \frac{1}{\text{entropy}_i} \end{array}$$

172 **Semantic representation** To describe the influence of semantic context, *semantic dissimilarity* was used  
173 as a measure of how dissimilar a content word is compared to its preceding context (Broderick et al., 2018).



174 Unlike linguistic representations at the word level, this representation takes into account sentence boundaries.  
175 For each content word in the story, a word embedding was retrieved from a database with word embeddings  
176 obtained with word2vec (Tulkens et al., 2016) using a combination of different Dutch text corpora (Roularta  
177 (Roularta Consortium, 2011), Wikipedia (Wikipedia, 2015), SoNaR corpus (Oostdijk et al., 2013)). To  
178 obtain a value of semantic dissimilarity for a content word, the word embedding of the considered word was  
179 correlated (Pearson's correlation) with the average of the previous content words in the considered sentence.  
180 This correlation value was subtracted from 1 to obtain a value which reflects how dissimilar the word is  
181 compared to its context. If the word was the initial content word of the sentence, its word embedding was  
182 correlated with the average of the word embeddings of the content words in the previous sentence. The  
183 resulting representation was a one-dimensional array with impulses at content word onsets modulated by the  
184 value of how dissimilar the considered content word is compared to its context.

### 185 **Determination of neural tracking**

186 In this study, we focused on a linear forward modelling approach that predicts the EEG response given  
187 some preceding speech representations. This forward modelling approach results in (a) a temporal response  
188 function (TRF) and (b) a prediction accuracy for each EEG channel. A TRF is a linear kernel which describes  
189 how the brain responds to the speech representations. This TRF can be used to predict the EEG-response  
190 by convolving it with the speech representations. The predicted EEG-response is then correlated with the  
191 actual EEG-response, and correlation values are averaged across EEG channels to obtain a single measure  
192 of prediction accuracy. This prediction accuracy is seen as a measure of neural tracking: the higher the  
193 prediction accuracy, the better the brain tracks the stimulus.

194 (a) To estimate the TRF, we used the Eelbrain toolbox (Brodbeck, 2020) which estimates a TRF for each  
195 EEG electrode separately using the boosting algorithm by David et al. (2007). We used 4-fold cross-validation  
196 (4 equally long folds; 2 folds used for training, 1 for validation and 1 fold unseen during training for testing;  
197 for each testing fold, 3 TRF models were fit, using each of the remaining 3 folds as the validation fold in turn).  
198 Cross-validation employing the additional test stage using unseen data allows a fair comparison between  
199 models with different numbers of speech representations. TRFs covered an integration window from 0 to  
200 900 ms (with a basis of 50 ms Hamming windows, and selective stopping based on the  $\ell_2$ -norm after 1 step  
201 with error increase). For analyzing the TRFs, the resulting TRFs were averaged across all folds. (b) To  
202 calculate the prediction accuracy, the average TRF from 3 complimentary training folds was used to predict  
203 the corresponding unseen testing fold. Predictions for all testing folds were then concatenated to compute a  
204 single model fit metric. The correlation between the predicted and actual EEG was averaged across channels

205 to obtain the prediction accuracy.

206 To evaluate whether a speech representation had a significant added value, we compared whether the prediction  
207 accuracy significantly increased when the representation was added to the model (e.g., to determine the  
208 added value of word onsets over the spectrogram, we compared the prediction accuracy obtained with the  
209 model based on the spectrogram to the prediction accuracy of the model based on a combination of the  
210 spectrogram and word onsets).

### 211 **Determination of the peak latency**

212 The latencies of the response peaks in TRFs were determined for the linguistic speech representations at the  
213 phoneme level (Brodbeck et al., 2018). Based on the mean TRFs across participants, we identified different  
214 time windows in which we determined the peak latency (30-90 ms, 90-180 ms and 180-300 ms). For each  
215 subject, the latency was determined as the time of the maximum of the absolute values of the TRF across  
216 channels.

### 217 **Statistical analysis**

218 For the statistical analysis, we used the R software package (version 3.6.3) (R Core Team, 2020). We  
219 performed one-sided Wilcoxon signed-rank tests to identify whether the linguistic representations had added  
220 value beyond acoustic and lexical segmentation representations. The outcomes of such a test are reported  
221 with a p-value and effect size. All tests were performed with a significance level of  $\alpha = 0.05$ . To inspect  
222 whether the latencies differed significantly, a two-sided Wilcoxon signed-rank test was performed.

223 To compare topographic responses, we applied a method proposed by McCarthy and Wood (1985), which  
224 evaluates whether the topography differs between two conditions when amplitude effects are discarded.  
225 The method is based on an ANOVA testing for an interaction between sensor and condition, i.e., testing  
226 whether the normalized response pattern across sensors is modulated by condition. We compared the average  
227 topographic response within specific time windows. These time windows were determined as the intersections  
228 of the time intervals in which the smoothed average TRFs of a frontal and a central channel selection  
229 significantly differed from 0, for a duration of more than one sample, after smoothing using a hamming kernel  
230 of 100 ms. This smoothing was performed to decrease the inter-subject variability of the peak latencies.

231 To determine the significance of TRFs, we used mass-univariate cluster-based permutation tests proposed  
232 by Maris and Oostenveld (2007), using the Eelbrain (Brodbeck, 2020) implementation. All tests used a  
233 cluster-forming threshold of uncorrected  $p=0.05$ , and evaluated clusters based on the cluster mass statistic,  
234 tested against a random distribution determined based on 10 000 random permutations of the data. We

235 tested whether the average TRF was significantly different from 0 using permutation tests based on two-tailed  
236 one-sample t-tests. To determine whether the TRF differed between two speech representations, we used  
237 permutation tests based on related-measures t-tests. For determining significant clusters, we used a corrected  
238 significance level of  $\alpha = 0.05$ .

239 We also compared how well responses to different stories could be predicted using the same TRFs. To  
240 determine the effect of the story on neural tracking (averaged across EEG sensors), we used the Buildmer  
241 toolbox to identify the best linear mixed model (LMM) given a series of predictors and all their possible  
242 interactions based on the likelihood-ratio test (Voeten, 2020). The analysis included a factor with a level  
243 for each story, a continuous predictor reflecting the presentation order, a distance-from-training-data metric  
244 and a random effect for participant. The presentation order predictor reflects the linear presentation order  
245 during the experiment and would therefore be able to model changes of neural tracking over the course of the  
246 experiment. The distance-from-training-data metric is calculated as the number of stories presented between  
247 the presentation of the story and DKZ. This metric would allow to investigate whether neural tracking is  
248 affected by the subject's mental state (e.g. tiredness; stories presented right before or after the training story  
249 DKZ have a similar mental state and therefore the neural tracking should be similar).

## 250 **Results**

### 251 **Linguistic properties are reliably tracked within story**

252 We first analyzed responses to linguistic representations in a single story (DKZ: 45 minutes; 29 participants).  
253 At each level of representations, we first verified whether the full set at each level of linguistic representations  
254 had an added value over and beyond the acoustic and lexical segmentation representations (Figure 2.A). At  
255 both the phoneme and the word level, a model which included all linguistic representations of the considered  
256 level showed a significantly higher prediction accuracy compared to a model which only included acoustic and  
257 lexical segmentation representations (phoneme level:  $p < 0.001$ , effect size=0.682; word level:  $p = 0.015$ , effect  
258 size=0.405). However, semantic dissimilarity did not have a significant added value over and beyond acoustic  
259 and lexical segmentation representations ( $p = 0.641$ ; Figure 2.A). In previous literature, a significant neural  
260 tracking to semantic dissimilarity is reported, however, without controlling for acoustic feature or content  
261 word onsets. Consistent with this earlier result, we did observe that semantic dissimilarity by itself does  
262 yield prediction accuracies significantly above 0 ( $p < 0.001$ ; effect size=0.925). We further found that semantic  
263 dissimilarity retains its added value over and beyond content word onsets ( $p < 0.001$ , effect size=0.592).  
264 However, as stated above, when fully controlling for acoustic speech representations over and above word and

265 phoneme onsets, no added value of semantic dissimilarity was observed.

266 At the phoneme and word level, we identified which linguistic representations within the considered level  
267 contributed significantly over and beyond the other linguistic representations at that level and the acoustical  
268 and lexical segmentation representations (Figure 2.B). At the phoneme level, phoneme surprisal and cohort  
269 entropy both had a significant added value over and beyond each other and acoustic speech representations  
270 (phoneme surprisal:  $p < 0.001$ , effect size=0.702; cohort entropy:  $p = 0.046$ , effect size=0.313). However, for  
271 the linguistic representations at the word level, only word surprisal ( $p = 0.004$ , effect size=0.492) and word  
272 frequency ( $p = 0.019$ , effect size=0.384) contributed significantly to the model while word entropy ( $p = 0.275$ )  
273 and word precision ( $p = 0.609$ ) did not have an added value.

274 Subsequently, we combined all the significant linguistic representation at the word and phoneme levels derived  
275 from the first analysis. The significant linguistic speech representations at the phoneme level had an added  
276 value over and beyond the significant linguistic speech representations at the word level ( $p = 0.001$ , effect  
277 size=0.589) and vice versa ( $p = 0.008$ , effect size=0.448). On average, the prediction accuracy improved by  
278 1.05 % when the linguistic representations were added to a model which only contains the acoustic and  
279 lexical segmentation properties of the speech (prediction accuracy increased with  $3.4 \times 10^{-4}$ ,  $p < 0.001$ , effect  
280 size=0.713; Figure 2.C). The increase in prediction accuracy over the different sensors is visualized in Figure  
281 2.C (right inset).

## 282 **Neural responses to linguistic features**

283 We investigated whether the significant linguistic representations reflect separate language processing stages  
284 by inspecting their TRFs, averaged across participants. Based on the analysis above, we identified a central  
285 and a frontal channel selection in which the prediction accuracy significantly increased when the linguistic  
286 representations were added to the model (Figure 2.C: right). The differences in TRFs at the two sensor  
287 groups suggests that there might be more than one neural source contributing to the results. To test this  
288 explicitly, we tested in specific time windows whether the topographies were different (McCarthy and Wood,  
289 1985) (time windows were determined based on the smoothed average TRFs and are annotated with the  
290 grey horizontal bar in Figure 3). A significant difference between two topographies suggests that the neural  
291 sources underlying the two topographies are different.

292 The TRFs for phoneme surprisal and cohort entropy are shown in Figure 3 (left) for both channel selections  
293 (TRFs for all channels are shown in Figures A.2a and A.2b). Both linguistic representations at the phoneme  
294 level show a significant frontal negativity around 100 ms, and a significant central negativity around 250 ms

**A. Added value of the linguistic representations over and beyond acoustic and lexical segmentation properties**

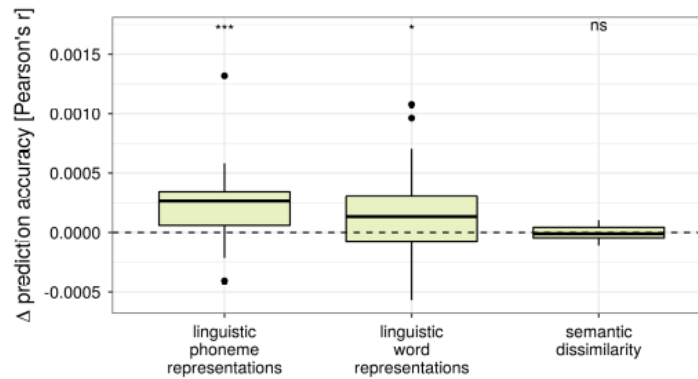

**B. Added value of the linguistic representations over and beyond acoustic and lexical segmentation properties as well as remaining linguistic representations at, respectively, phoneme or word level**

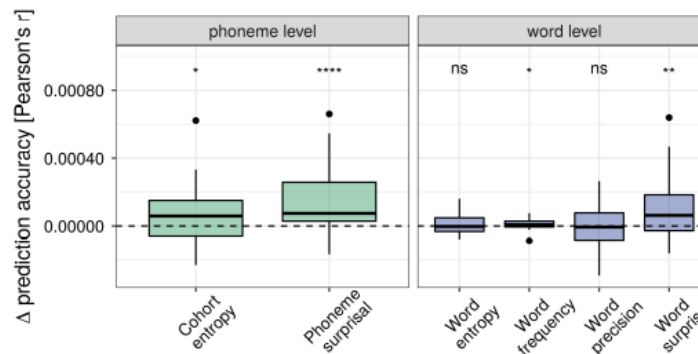

**C. Added value of the significant linguistic speech representations over and beyond acoustic and lexical segmentation properties**

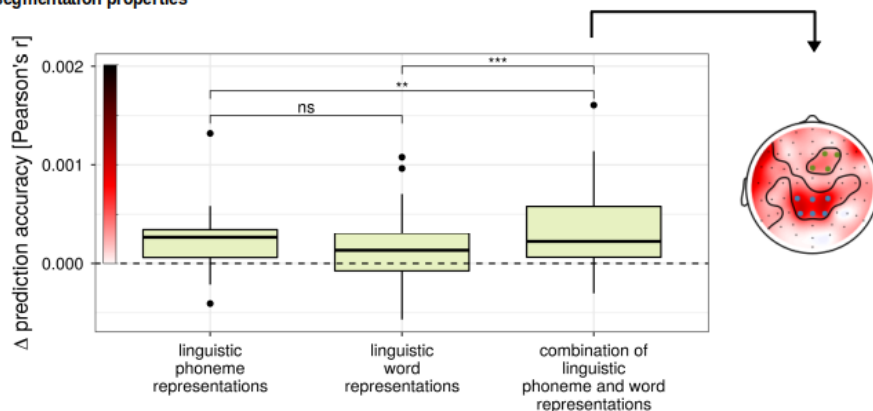

Figure 2: **Added value of linguistic representations averaged across channels:** Panel A: Increase in prediction accuracy (Pearson's  $r$ ) of the combined representations at each level compared to a baseline model which included acoustic and lexical segmentation properties of the speech. Panel B: Increase in prediction accuracy (Pearson's  $r$ ) of each representation compared to a baseline model which includes the other linguistic representations at the considered level. Panel C: Increase in prediction accuracy compared to a baseline model of a combination of the significant features averaged across channels (left) and in sensor space (right). (\*:  $p < 0.05$ , \*\*:  $p < 0.01$ , \*\*\*:  $p < 0.001$ , \*\*\*\*:  $p < 0.0001$ )

295 followed by positive activity from 400 to 800 ms in central regions. We asked whether there is any evidence  
296 that the neural sources underlying the two TRFs are different. We did not observe a significant difference in  
297 topography of the earlier negativity around 100 ms (Figure 3: bottom; Table A.2). Interestingly, we observed  
298 a significantly different topography in the time window from 414 ms to 562 ms, which indicates that the  
299 underlying neural sources are different (Figure 3; left; Figure A.3; Table A.1). However, judging from the  
300 difference map shown in Figure A.3, the difference in underlying neural sources is not easy to interpret, and  
301 could be due to a complex interplay between different neural sources. As the difference is difficult to interpret  
302 and the p-value is just below the significance threshold, the observed difference in topography might not be a  
303 robust effect.

304 The TRF to both phoneme-level representations shows 3 peaks (Figures A.2a and A.2b). Based upon the  
305 averaged TRF across participants, we identified 3 time windows wherein we determined the peak latency  
306 (respectively, 30 to 90 ms, 90 to 180 ms and 180 to 300 ms). We did not observe a significant difference in  
307 latency of all 3 peaks of phoneme surprisal and cohort entropy (30 to 90 ms:  $p=0.257$ , 90 to 180 ms:  $p=0.108$ ,  
308 180 to 300 ms:  $p=0.287$ ).

309 The neural responses to the linguistic representations at the word level are shown in Figure 3 (right). Both  
310 representations show a significant positive activation in frontal regions around 50 ms, and a prominent  
311 negativity around 300 to 400 ms after the word onsets. However, the amplitude of this negativity is smaller  
312 for word frequency. Interestingly, we identified a significant difference in topography for this negativity after  
313 discarding amplitudes effects (Figure 3: bottom; Figure A.5; Table A.3). The negativity for word frequency  
314 is situated more centrally compared to the negativity for word surprisal. The topography during the early  
315 responses to the word onset is also significantly different between the two speech representations (Figure A.5;  
316 Table A.4). Figure A.5 shows that word surprisal shows more central activation while the early activity of  
317 word frequency is situated more laterally.

318 Additionally, we compared the topography of the negativity around 200 ms of phoneme surprisal (164 ms to  
319 343 ms) to the topography of the negativity around 400 ms of word surprisal (242 ms to 531 ms). The method  
320 proposed by McCarthy and Wood (1985) did not identify a significant difference between these topographies  
321 (Figure A.6).

## 322 **Neural processing of content and function words**

323 Initially, we used a baseline model that represented acoustic properties and the speech's lexical segmentation.  
324 This model was kept constant to investigate the added value of different speech representations. However, as

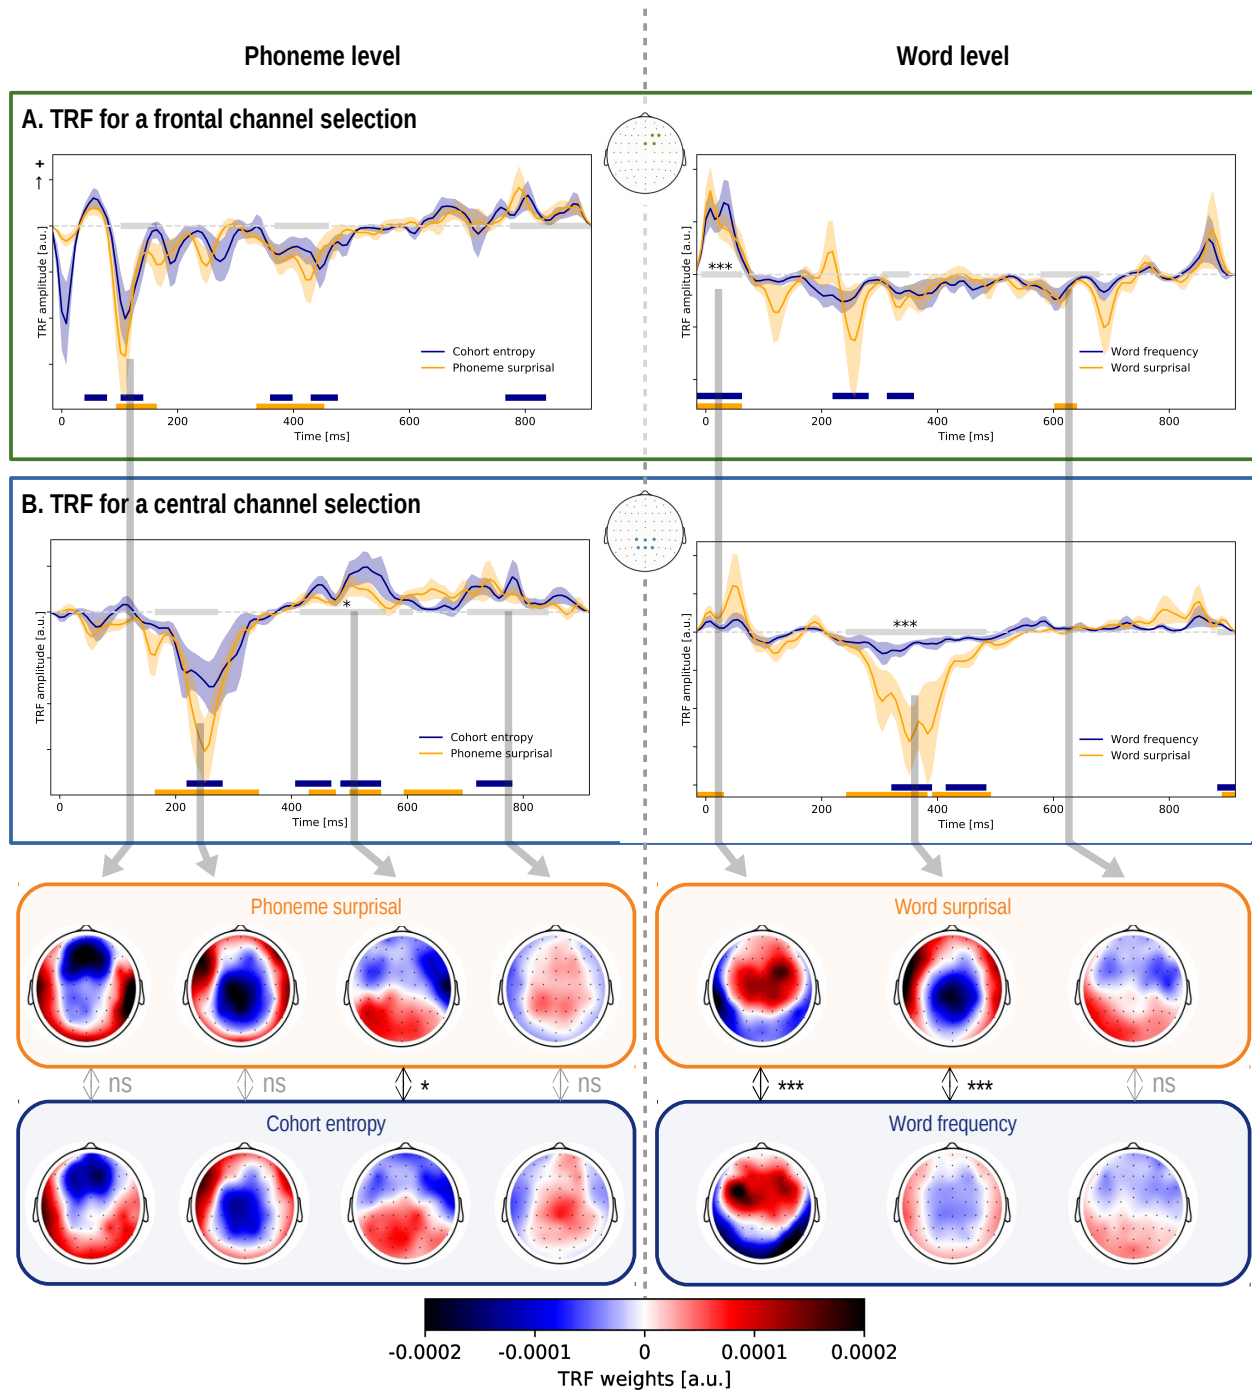

**Figure 3: TRFs of linguistic representations at the phoneme and word level:** The TRFs, averaged across participants for the different linguistic representations and a channel selection (shown in the central inset). The shaded area denotes the standard error of the average TRF. The time windows which are significantly different from zero are annotated with a horizontal line in the same colour as the TRF of the speech representations. The grey horizontal line denotes the time windows in which the two representations' average topographies are compared. If a significant topography was observed, the time window is annotated with a grey star. The corresponding topographies, averaged across this time window, are given as inset below encircled in the same colour as the TRF. The reported p-value is the p-value as result of the McCarthy-Wood method (for this method the normalized topographies are used which are not visualized here).

(\*:  $p < 0.05$ , \*\*:  $p < 0.01$ , \*\*\*:  $p < 0.001$ , \*\*\*\*:  $p < 0.0001$ )



325 we did not observe an added value of semantic dissimilarity, which was encoded at every content word, we  
326 investigated whether word onsets split up depending on the word class had an added value (Brennan and  
327 Hale, 2019). In this analysis, we determined whether the differentiation between content and function words  
328 has an added value by three different models: (A) a baseline model including word onsets and the linguistic  
329 representations at the word level independent of the word class, (B) a model which differentiated between  
330 content words and function words for both word onsets as well as the linguistic representations at the word  
331 level, and (C) a model including a differentiation between content and function words for the word onsets but  
332 not for the linguistic representations at the word level. For the latter two models, a word onsets predictor for  
333 all words was included as well to capture TRF components shared between all words.

334 We observed an added value of the word class predictors (model C obtains higher prediction accuracies  
335 compared to model A:  $p < .001$ , effect size = 0.723; inset in Figure 4). However, we did not observe an  
336 added value of differentiating the linguistic speech representations at the word level depending on the word  
337 class (model B does not obtain higher prediction accuracies than model C:  $p=0.947$ ). Thus, the response to  
338 function words differs from the response to content words, but the word class does not modulate responses  
339 related to word frequency and surprisal.

340 Subsequently, we investigated the difference in the response to content and function words by looking at the  
341 TRFs (Figure 4; TRFs for all channels are shown in Figure A.8a and A.8b). For this analysis, we combined  
342 the TRF of word onsets and the TRF of content or function words to obtain the response to, respectively, a  
343 content or function word. The neural responses to words in both classes showed a significant central positivity  
344 around 50 ms and a negativity around 350 ms. In addition, the response to content words showed a significant  
345 positivity around 200 ms, while a slightly earlier significant negative response was observed in the response to  
346 function words.

347 For all the above mentioned time windows, a significant difference in topography was observed. The early  
348 response to function words is situated more centrally than the response to content words while the early  
349 response to content words shows more frontal activity. In the subsequent time windows around 200 ms,  
350 the response to content words shows a frontal negativity. The response to function words around 200 ms  
351 resembles the early response to word onsets with lateralized frontotemporal activation (see Figure 4-C, first  
352 topography). Around 350 ms, a central negativity is observed for both responses. This time window is also  
353 associated with a difference in topography, but the difference between the two topographies is difficult to  
354 interpret (Figure A.7; Table A.5).

355 As noted above, the topography of the response to function words around 200 ms resembles the initial



356 response to word onsets. This might be due to the properties of the different word classes: the duration of  
357 function words is generally shorter than that of content words which implies that the time interval between a  
358 word and its next word is shorter for function words (on average 239 ms for a function word while 600 ms for  
359 a content word). The response to function words might thus be more contaminated by a response to the  
360 subsequent word onset. We investigated whether the TRF of function words was contaminated by the onset  
361 of the next word. We divided function words into two categories: function words for which the next word  
362 followed later than 300 ms ( $n = 587$ ) or earlier than 300 ms ( $n = 2908$ ). The TRF for function words for  
363 which the next word followed later than 300 ms significantly differed from the TRF for function words for  
364 which the next word followed earlier than 300 ms. This significant difference was mainly situated in the early  
365 response up to 250 ms (3 significant clusters: from 0 to 273 ms in 29 central channels ( $p < 0.001$ ), from 0 to  
366 250 ms in 17 occipital channels ( $p < 0.001$ ) and from 297 ms to 430 ms in 17 central channels ( $p = 0.008$ )).  
367 Additionally, the TRF for function words for which the next word followed later than 300 ms did not show a  
368 significant activity around 200 ms (the TRF was significant from 0 to 117 ms for 9 frontal channels ( $p = 0.009$ )  
369 and from 851 to 914 ms for 10 parietal channels ( $p = 0.031$ )). These findings suggest that the TRF of function  
370 words was indeed contaminated by the onset of the next word. The responses to short and long function  
371 words are shown in Figure A.9 (response was obtained by combining the TRF of word onsets and the TRF of  
372 the considered function word category).

### 373 **Across story**

374 To confirm that responses to linguistic features are consistent across speaker and story, we verified whether  
375 linguistic speech representations have added value when the model was trained on DKZ and used to predict  
376 brain responses to other stories. Except for DWZ\_1 ( $p = 0.194$ ) and DOL ( $p = 0.083$ ), a significant increase in  
377 prediction accuracy is seen when the linguistic speech representations are added (AEDV\_1:  $p < .001$ , effect  
378 size=1.035; AEDV\_2:  $p = 0.013$ , effect size=0.466; DWZ\_2:  $p = 0.03$ , effect size=0.431; Eline:  $p < .001$ , effect  
379 size=0.799; Figure 5.A).

380 To determine whether or not this variation across the different stories was significant, we identified the  
381 best LMM, using the predictors story identity, presentation order and presentation distance, to explain the  
382 difference in prediction accuracy between the model including linguistic representation compared to a model  
383 which only contained the acoustic and lexical segmentation representations. We observed that only the  
384 considered story is a significant predictor (LMM using only story as a predictor:  $AIC = -1231.0$  compared to  
385 LMM using only the random effect:  $AIC = -1229.6$ ). Based on the restricted maximum likelihood, no added  
386 value of the presentation order was observed (LMM using both story and presentation order as predictors:

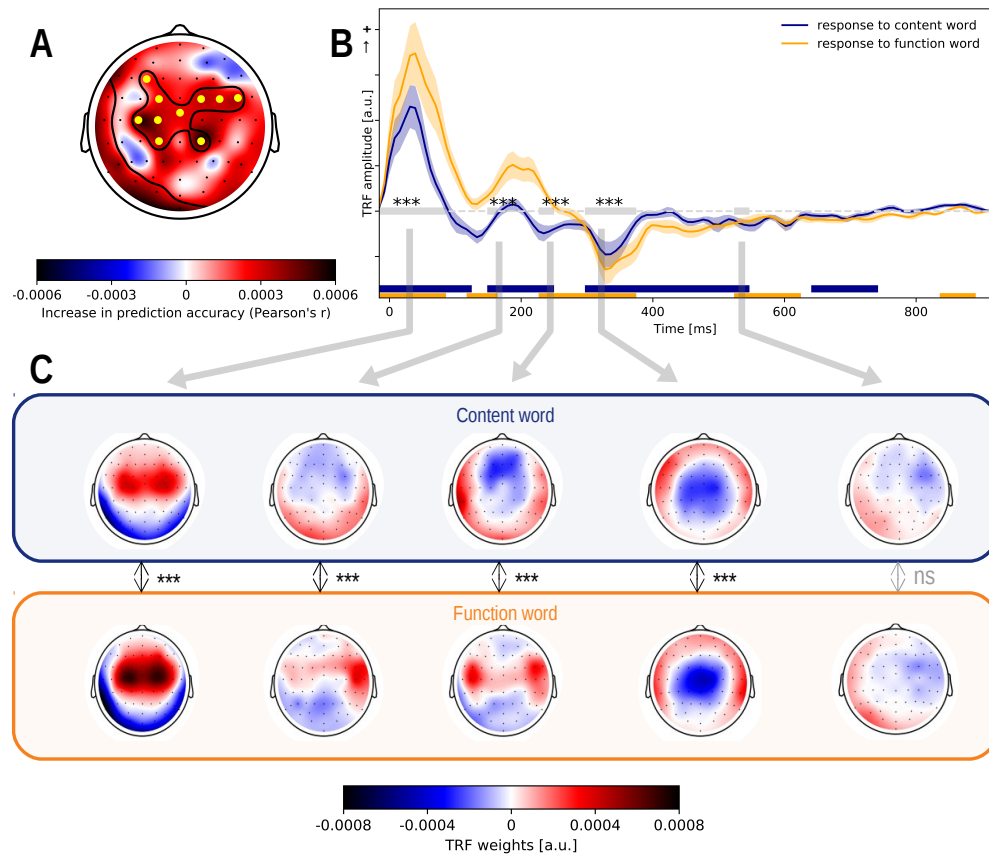

**Figure 4: The response to words depends on the word class:** Panel A: The increase in prediction accuracy (Pearson's  $r$ ) of including representations for the word classes into the model. Panel B: The response to content (blue) and function words (yellow), averaged across participants and a channel selection (marked yellow in Panel A) where the improvement of the differentiation between the word classes was significant. The shaded area denotes the standard error of the average TRF. The windows which are significantly different from zero are annotated with a horizontal line in the same colour as the TRF. The grey horizontal line denotes the time windows in which the two speech representations' average topographies are compared. If a significant topography was observed, the time window is annotated with a grey star. The corresponding topographies averaged across this time window, are given as insets below encircled in the same colour as the TRF. The reported p-value is the p-value as result of the McCarthy-Wood method (for this method the topographies are used which are not visualized here).

(\*:  $p < 0.05$ , \*\*:  $p < 0.01$ , \*\*\*:  $p < 0.001$ , \*\*\*\*:  $p < 0.0001$ )

387 AIC=-1229.5, LMM using both story and distance-from-training-data metric as predictors: AIC=-1230.2 or  
388 LMM using story, presentation order and distance-from-training-data metric as predictors: AIC=-1228.8).  
389 The observed added value of the linguistic speech representations thus differed significantly between stories,  
390 and presentation order was not able to explain this effect.

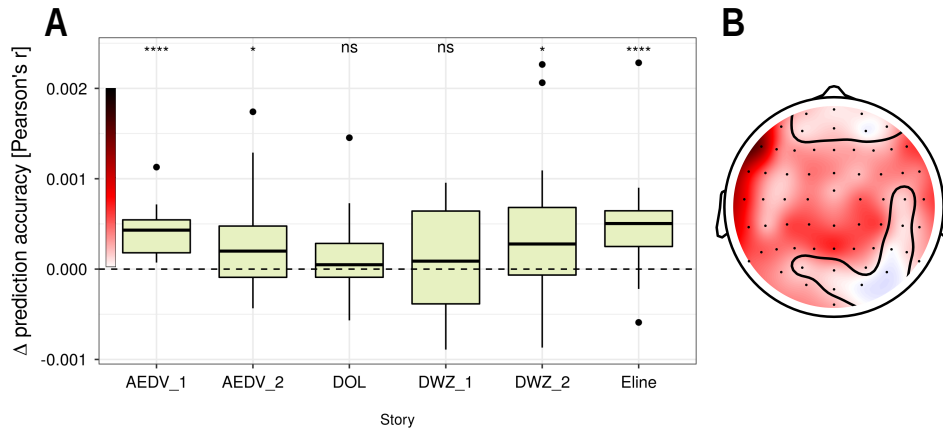

Figure 5: **Added value of linguistic speech representations across story**: Panel A: Increase in prediction accuracy (Pearson's r) averaged across all sensors of the model including the linguistic representations compared to the model which only includes acoustic and lexical segmentation properties of the speech. Panel B: The increase in prediction accuracy, averaged across stories, in sensor space. A cluster-based permutation test resulted in one large cluster encompassing almost all sensors; the channels which were *not* included in the cluster are encircled.

## 391 Discussion

392 We evaluated which linguistic speech representations are tracked over and beyond the neural tracking of acoustic  
393 and lexical segmentation representations. The brain reliably tracked phoneme surprisal, cohort entropy, word  
394 frequency and word surprisal. Additionally, we showed that the tracking of linguistic representations is similar  
395 across stories. Even when trained on a different story, we observed a significant increase in prediction accuracy  
396 of linguistic representations when added to a model that accounted for the speech's acoustic properties and  
397 lexical segmentation.

## 398 Reliable tracking of linguistic representations at the phoneme level

399 For the linguistic representations at the phoneme level, both phoneme surprisal and cohort entropy had a  
400 significant added value compared to the acoustic and lexical segmentation representations. Similarly, as  
401 reported by Brodbeck et al. (2018), these phonemic linguistic representations had added value over and  
402 beyond each other, which suggests that both representations contributed differently to the model.

403 Brodbeck et al. (2018) reported significantly different latencies for phoneme surprisal and cohort entropy  
404 respectively around 114 ms and 125 ms. We did not observe a significant difference in latency between  
405 phoneme surprisal and cohort entropy. Additionally, Brodbeck et al. (2018) reported that the anatomical  
406 regions of the responses to these speech representations did not significantly differ. In our results, the  
407 topographic response of phoneme surprisal and cohort entropy in a time window around 100 ms did not  
408 significantly differ either, suggesting spatially similar neural sources (Table A.2). A clear difference with  
409 the neural responses in the study by Brodbeck et al. (2018) is that the neural responses show more than  
410 one prominent peak in our study. This might be due to the difference in modality: EEG is sensitive to the  
411 responses of neural sources which cannot be recorded with MEG.

412 Brodbeck et al. (2018) did not elaborate on later activity in the TRF. We observed a negativity around  
413 250 ms for central channels. This activity did not significantly differ in latency or topography between the  
414 two linguistic representations. However, in a later time window around 400 to 500 ms, a significantly different  
415 topographic response is observed for phoneme surprisal and cohort entropy (Figure 3; Table A.1) suggesting  
416 different underlying neural sources. In the current study, we cannot pinpoint this difference's precise nature  
417 because we did not perform source localization. However, this difference in topography is consistent with  
418 the interpretation that the two representations represent distinct speech processing stages. As Brodbeck  
419 et al. (2018) suggest, phoneme surprisal might reflect a measure of phoneme prediction error which is used to  
420 update the active cohort of lexical items. In contrast, cohort entropy likely reflects a representation of this  
421 cohort of activated lexical items. On the other hand, as the TRF follow a similar time course, the underlying  
422 neural activity might be correlated with both linguistic representations at the phoneme level.

### 423 **Reliable tracking of linguistic representations at the word level**

424 For the linguistic representations at the word level, word surprisal and word frequency had a significant added  
425 value compared to each other and acoustic and lexical segmentation representations. However, word entropy  
426 and word precision did not improve the prediction accuracies.

427 Word surprisal was identified as a significant predictor in continuous speech which is in line with the previous  
428 literature (Weissbart et al., 2020; Koskinen et al., 2020). This suggests that the human brain responds when a  
429 word is surprising given the previous words. Although word frequency and word surprisal are correlated, there  
430 is an added value of word frequency over and beyond word surprisal (and vice versa). We cannot exclude the  
431 possibility that the added-value of word frequency is due to correlations with other word-related predictors,  
432 such as the word duration or the concreteness of the word, as we did not include those in our analysis.

433 The obtained TRFs to word surprisal and word frequency were consistent with previous reports (Weissbart  
434 et al., 2020). The neural responses to both linguistic representations show a negativity around 400 ms in central  
435 parietal areas which can be related to the typical N400 response derived in ERP studies. Interestingly, when  
436 discarding this negativity's amplitude around 400 ms, we observed a significant difference in topography (Figure  
437 3; Figure A.5) suggesting that different underlying neural sources evoke the responses. It is hypothesized that  
438 the N400 responses might reflect multiple processes, e.g. activation of lexical items which suggest that certain  
439 words are easier to access from memory as well as the semantic integration of the word into its context (for a  
440 review Lau et al. (2008) and Kutas and Federmeier (2011)). Our findings suggest that the word surprisal  
441 and word frequency represent different processes, reflected in the N400, during language comprehension. We  
442 hypothesize that the response to word frequency is related to the activation of lexical items, as a word with a  
443 higher frequency is easier to access in long term memory. Word surprisal, as it represents the probability of a  
444 word given the preceding words, might represent a combination of lexical activation and semantic integration.  
445 Interestingly, the response to word surprisal around 400 ms was very similar to the response around 200 ms in  
446 phoneme surprisal, and the two topographies did not differ significantly, suggesting similar underlying neural  
447 sources (Figure A.6). This might suggest that the two effects reflect a shared neural process responding to  
448 surprising linguistic input.

449 Although previous studies reported an added-value of word entropy and word precision (Willems et al., 2016;  
450 Weissbart et al., 2020), those predictors did not significantly improve the prediction accuracy in our data.  
451 Using functional magnetic resonance imaging (fMRI), Willems et al. (2016) reported significant responses to  
452 word entropy, derived from a 3-gram model, in continuous speech. In their study, however, word entropy  
453 was modeled as the uncertainty of the next word while in our study it was defined as the uncertainty of the  
454 considered word. If the effect observed in fMRI reflects brain activity related to predicting the next word, as  
455 suggested by Willems et al. (2016), then we might not expect an effect of current-word entropy in EEG, as  
456 the corresponding brain activity might have occurred on the previous word. However, another important  
457 difference is the imaging modality; possibly, the more distributed parietal and frontal sources associated  
458 with entropy are less visible in EEG. Finally, in contrast to fMRI, our EEG methodology assumes strictly  
459 time-locked effects. Thus, if an effect is not strictly time-locked, it might be detected in fMRI but not in  
460 EEG and vice versa.

461 We also did not observe an added value of word precision, in contrast to Weissbart et al. (2020). Weissbart  
462 et al. (2020) reported that the precision of the prediction modulates the neural response to surprisal. However,  
463 these divergent results might be explained by differences in methodology. We focus on a significant added  
464 value in prediction accuracy averaged across channels while they determined the significance of the TRF.

465 Because different speech representations are derived from the same speech signal, they are usually correlated.  
466 Therefore, a non-significant speech representation can still obtain a significant TRF due to its correlation  
467 with a significant speech representation. By looking at the prediction accuracies, we evaluated whether the  
468 information of one speech representation contributes over and beyond the information contained in the other  
469 speech representations. It is, of course, also possible that word precision is associated with a real effect but  
470 only provides very little non-redundant information, and such a small effect might not have been detected in  
471 our study.

472 Another difference is that Weissbart et al. (2020) used a recurrent neural network (RNN) to derive the  
473 word-level features. This allows including the whole text as context instead of just n-1 previous words.  
474 However, we are hesitant to identify the difference in language models as the likely cause of this difference,  
475 because RNNs did not outperform n-gram models in predicting brain data in studies that directly compared  
476 the two. Brennan and Hale (2019) did not find a difference in the performance of sequential language models  
477 when using part-of-speech surprisal derived from a recurrent neural network compared to an n-gram model.  
478 Additionally, in an ERP study by Frank et al. (2015), the N400 response correlated better with part-of-speech  
479 surprisal derived from an n-gram model compared to the value derived from an RNN.

480 Combining the significant linguistic representations at the phoneme and word level significantly improved  
481 the prediction accuracies in central channels, frontal channels and left frontotemporal channels (Figure  
482 2.C). The significance in these left frontotemporal channels suggests additional evidence that the linguistic  
483 representations reflect language processing.

## 484 **No significant neural tracking of linguistic speech representations at the contex-** 485 **tual level**

486 The predictor semantic dissimilarity did not show a significant added value over and beyond acoustic and  
487 lexical segmentation properties of the speech. This is not in line with previous findings (Frank and Willems,  
488 2017; Broderick et al., 2018). A study of sentence reading by Frank and Willems (2017) suggested that  
489 word surprisal and semantic similarity have indistinguishable N400-like effects on ERPs. In a parallel fMRI  
490 analysis, where the participant listened to short fragments of audio books, they suggested that processes  
491 associated with the two variables are localized differently in the brain. Similarly, Broderick et al. (2018)  
492 showed that in a natural speech, semantic dissimilarity is tracked by the brain. To address this discrepancy  
493 with the results here, a more detailed analysis was performed, which showed that that semantic dissimilarity  
494 does provide added value over and beyond content words without controlling for other acoustic and lexical  
495 segmentation properties of the speech. This suggests that semantic dissimilarity may explain a response to

496 acoustic properties of the speech rather than a response to language processing. In line with our results,  
497 Dijkstra et al. (2020) reported that no added value of semantic dissimilarity was seen after controlling for  
498 content word onsets.

## 499 **Neural tracking depending on the word class**

500 We observed that the differentiation between content and function words for word onsets improves the  
501 prediction accuracy. However, making this differentiation for word surprisal and word frequency did not  
502 result in increased prediction accuracies. Similar to Frank et al. (2015), we can conclude that the neural  
503 response to these linguistic speech representations depends on the variation between the words independent of  
504 word class. Similarly, using continuous speech, Brennan and Hale (2019) observed that word surprisal derived  
505 from sequential language models (RNN and n-gram) did not interact with the word class. This suggests that  
506 neural processing of the word's content might be largely independent of its word class.

507 As we did not observe an added value of separating the function words based on the timing of its next word,  
508 we hypothesize that the activity around 200 ms is an acoustic response to the onset of the subsequent word.  
509 This was confirmed by an additional analysis: separation between function words with a short and long time  
510 interval between the word and its next word, did not have an added value. This suggests that the response to  
511 a function word where the next word starts later than 300 ms does not differ from the response to just the  
512 word onset. As the TRF to word onset does not show this activity around 200 ms, we therefore presume that  
513 the TRF to function words is biased by acoustic representation leakage from the next word.

514 Due to the acoustic representation leakage from the next word, we cannot compare the response of a content  
515 word to the response of a function word. Therefore, we only discuss the response to a content word. The  
516 response to content words shows a peak around 200 ms associated with a frontal negativity. Brennan and  
517 Hale (2019) also observed a negative frontal activity around 200 ms. However, in their results, the negativity  
518 was more lateralized. This was only observed for content words and not present for function words in response  
519 to hierarchical surprisal for a word's part-of-speech (Brennan and Hale, 2019). As we did not include this  
520 hierarchical surprisal representation in our analysis, its response might be modeled with to the content word  
521 predictor. Additionally, we observed a significant difference in topography for the N400. This also contributes  
522 to the hypothesis that content words and function words have different neural generators (Pulvermüller et al.,  
523 1995).

## 524 **Neural tracking across stories**

525 When the model trained on one story is applied to another story, an added value of the linguistic representations  
526 is seen in 4 out of 6 stories or story parts. Although the mean of the difference in prediction accuracy is  
527 above 0, two stories (DOL and DWZ\_1) did not reach significance in the Wilcoxon tests. Looking at the  
528 analysis using a LMM, the presentation order did not explain variance in the observed prediction accuracies  
529 across the stories, but the story identity did. A possible explanation is that some stories or story parts may  
530 be more appealing than others due to the story content, influencing the measured signal to noise ratio (SNR)  
531 of the measured EEG responses.

532 A caveat of this study is that the stimulus does not allow to compare the predictors between an understandable  
533 and a not understandable condition. However, as we investigated the neural tracking across different stories,  
534 we observed an added value of these linguistic representations for most stories: 4 out of 6 stories which were  
535 spoken by either the same or a different speaker with the same or opposite sex as the speaker of the training  
536 story. Looking at table 1, it is not the case that the story spoken by the same speaker or a speaker of the  
537 same sex performs best. This suggests that the tracking of linguistic representations is largely independent of  
538 speaker characteristics and the story's content. Therefore, we hypothesize that the neural tracking of these  
539 speech representations represents language processing rather than tracking the speech's acoustic properties or  
540 lexical segmentation.

541 Our results show that linguistic representations of the speech are reliably tracked by the brain over and beyond  
542 acoustic and lexical segmentation properties. Many recent studies focus on linguistic representations of the  
543 speech without properly controlling for acoustic properties. We want to stress the importance of controlling  
544 for acoustic and lexical segmentation properties. We have further shown that these linguistic representations  
545 can be trained on one story and applied to another story, which supports the idea of generalized tracking  
546 across stories and narrators. Since these linguistic representations are tracked over and beyond acoustics, and  
547 across different stories, this provides strong evidence that these representations represent language processing.  
548 These findings pave the way for development of a neural marker for speech intelligibility, which would allow  
549 for behaviour-free evaluation of the speech intelligibility.

## 550 **Conclusion**

551 Linguistic representations explain the brain responses over and beyond acoustic responses to speech. We  
552 found significant neural tracking of phoneme surprisal, cohort entropy, word surprisal and word frequency over  
553 and beyond the tracking of the speech's acoustic properties and lexical segmentation. This was not observed



554 for word entropy, word precision and semantic dissimilarity. In this paper, we showed the importance of  
555 controlling for acoustic and lexical segmentation properties of the speech when estimating the added value of  
556 linguistic representations.

557 Additionally, we were able to predict brain responses to speakers and stories not seen during training. This  
558 suggests that the processing of these linguistic speech representations is independent of the presented content  
559 and speaker and, therefore, show evidence that higher stages of languages processing are modelled. Therefore  
560 these linguistic representations show promise for a behaviour-free evaluation of the speech intelligibility in  
561 audiological and other clinical settings.

## References

- 562
- 563 Accou, B., Monesi, M. J., Montoya, J., Van hamme, H., and Francart, T. (2020). Modeling the relationship  
564 between acoustic stimulus and eeg with a dilated convolutional neural network. In *2020 28th European*  
565 *Signal Processing Conference (EUSIPCO)*, pages 1175–1179. IEEE.
- 566 Aiken, S. J. and Picton, T. W. (2008). Human cortical responses to the speech envelope. *Ear and hearing*,  
567 29(2):139–157.
- 568 Biesmans, W., Das, N., Francart, T., and Bertrand, A. (2016). Auditory-inspired speech envelope extraction  
569 methods for improved eeg-based auditory attention detection in a cocktail party scenario. *IEEE Transactions*  
570 *on Neural Systems and Rehabilitation Engineering*, 25(5):402–412.
- 571 Brennan, J. R. and Hale, J. T. (2019). Hierarchical structure guides rapid linguistic predictions during  
572 naturalistic listening. *PloS one*, 14(1):e0207741.
- 573 Brodbeck, C. (2020). Eelbrain 0.32. <http://doi.org/10.5281/zenodo.3923991>.
- 574 Brodbeck, C., Hong, L. E., and Simon, J. Z. (2018). Rapid transformation from auditory to linguistic  
575 representations of continuous speech. *Current Biology*, 28(24):3976–3983.
- 576 Brodbeck, C., Jiao, A., Hong, L. E., and Simon, J. Z. (2020). Neural speech restoration at the cocktail party:  
577 Auditory cortex recovers masked speech of both attended and ignored speakers. *bioRxiv*, page 866749.
- 578 Brodbeck, C. and Simon, J. Z. (2020). Continuous speech processing. *Current Opinion in Physiology*.
- 579 Broderick, M. P., Anderson, A. J., Di Liberto, G. M., Crosse, M. J., and Lalor, E. C. (2018). Electrophysio-  
580 logical correlates of semantic dissimilarity reflect the comprehension of natural, narrative speech. *Current*  
581 *Biology*, 28(5):803–809.
- 582 Das, N., Biesmans, W., Bertrand, A., and Francart, T. (2016). The effect of head-related filtering and  
583 ear-specific decoding bias on auditory attention detection. *Journal of neural engineering*, 13(5):056014.
- 584 Daube, C., Ince, R. A., and Gross, J. (2019). Simple acoustic features can explain phoneme-based predictions  
585 of cortical responses to speech. *Current Biology*, 29(12):1924–1937.
- 586 David, S. V., Mesgarani, N., and Shamma, S. A. (2007). Estimating sparse spectro-temporal receptive fields  
587 with natural stimuli. *Network: Computation in neural systems*, 18(3):191–212.
- 588 Dijkstra, K., Desain, P., and Farquhar, J. (2020). Exploiting electrophysiological measures of semantic  
589 processing for auditory attention decoding. *bioRxiv*.

- 590 Ding, N. and Simon, J. Z. (2012a). Emergence of neural encoding of auditory objects while listening to  
591 competing speakers. *Proceedings of the National Academy of Sciences*, 109(29):11854–11859.
- 592 Ding, N. and Simon, J. Z. (2012b). Neural coding of continuous speech in auditory cortex during monaural  
593 and dichotic listening. *Journal of neurophysiology*, 107(1):78–89.
- 594 Ding, N. and Simon, J. Z. (2013). Adaptive temporal encoding leads to a background-insensitive cortical  
595 representation of speech. *Journal of Neuroscience*, 33(13):5728–5735.
- 596 Donhauser, P. W. and Baillet, S. (2020). Two distinct neural timescales for predictive speech processing.  
597 *Neuron*, 105(2):385–393.
- 598 Duchateau, J., Kong, Y. O., Cleuren, L., Latacz, L., Roelens, J., Samir, A., Demuynck, K., Ghesquière, P.,  
599 Verhelst, W., and Van hamme, H. (2009). Developing a reading tutor: Design and evaluation of dedicated  
600 speech recognition and synthesis modules. *Speech Communication*, 51(10):985–994.
- 601 Etard, O. and Reichenbach, T. (2019). Neural speech tracking in the theta and in the delta frequency band  
602 differentially encode clarity and comprehension of speech in noise. *Journal of Neuroscience*, 39(29):5750–  
603 5759.
- 604 Fishbach, A., Nelken, I., and Yeshurun, Y. (2001). Auditory edge detection: a neural model for physiological  
605 and psychoacoustical responses to amplitude transients. *Journal of neurophysiology*, 85(6):2303–2323.
- 606 Francart, T., Van Wieringen, A., and Wouters, J. (2008). Apex 3: a multi-purpose test platform for auditory  
607 psychophysical experiments. *Journal of neuroscience methods*, 172(2):283–293.
- 608 Frank, S. L., Otten, L. J., Galli, G., and Vigliocco, G. (2015). The erp response to the amount of information  
609 conveyed by words in sentences. *Brain and language*, 140:1–11.
- 610 Frank, S. L. and Willems, R. M. (2017). Word predictability and semantic similarity show distinct patterns  
611 of brain activity during language comprehension. *Language, Cognition and Neuroscience*, 32(9):1192–1203.
- 612 Gwilliams, L. and Davis, M. (2020). Extracting language content from speech sounds: An information  
613 theoretic approach. *The Auditory Cognitive Neuroscience of Speech Perception*, *In press*.
- 614 Heeris, J. (2014). Gammatone filterbank toolkit 1.0. <https://github.com/detly/gammatone>.
- 615 Horton, C., Srinivasan, R., and D’Zmura, M. (2014). Envelope responses in single-trial eeg indicate attended  
616 speaker in a ‘cocktail party’. *Journal of neural engineering*, 11(4):046015.
- 617 Iotzov, I. and Parra, L. C. (2019). EEG can predict speech intelligibility. *Journal of Neural Engineering*,  
618 16(3):036008.

- 619 Keuleers, E., Brysbaert, M., and New, B. (2010). Subtlex-nl: A new measure for dutch word frequency based  
620 on film subtitles. *Behavior research methods*, 42(3):643–650.
- 621 Klein, D. and Manning, C. D. (2003a). Accurate unlexicalized parsing. In *Proceedings of the 41st annual*  
622 *meeting of the association for computational linguistics*, pages 423–430.
- 623 Klein, D. and Manning, C. D. (2003b). Fast exact inference with a factored model for natural language  
624 parsing. In *Advances in neural information processing systems*, pages 3–10.
- 625 Koskinen, M., Kurimo, M., Gross, J., Hyvärinen, A., and Hari, R. (2020). Brain activity reflects the  
626 predictability of word sequences in listened continuous speech. *NeuroImage*, page 116936.
- 627 Kutas, M. and Federmeier, K. D. (2011). Thirty years and counting: finding meaning in the n400 component  
628 of the event-related brain potential (erp). *Annual review of psychology*, 62:621–647.
- 629 Lau, E. F., Phillips, C., and Poeppel, D. (2008). A cortical network for semantics:(de) constructing the n400.  
630 *Nature Reviews Neuroscience*, 9(12):920–933.
- 631 Lesenfants, D., Vanthornhout, J., Verschueren, E., Decruy, L., and Francart, T. (2019). Predicting individual  
632 speech intelligibility from the cortical tracking of acoustic-and phonetic-level speech representations. *Hearing*  
633 *research*, 380:1–9.
- 634 Maris, E. and Oostenveld, R. (2007). Nonparametric statistical testing of eeg-and meg-data. *Journal of*  
635 *neuroscience methods*, 164(1):177–190.
- 636 Marslen-Wilson, W. D. (1987). Functional parallelism in spoken word-recognition. *Cognition*, 25(1-2):71–102.
- 637 McCarthy, G. and Wood, C. C. (1985). Scalp distributions of event-related potentials: an ambiguity associated  
638 with analysis of variance models. *Electroencephalography and Clinical Neurophysiology/Evoked Potentials*  
639 *Section*, 62(3):203–208.
- 640 Monesi, M., Accou, B., Montoya-Martinez, J Francart, T., and Van hamme, H. (2020). An lstm based  
641 architecture to relate speech stimulus to eeg. In *ICASSP, IEEE International Conference on Acoustics,*  
642 *Speech and Signal Processing-Proceedings. IEEE.*
- 643 Oostdijk, N., Reynaert, M., Hoste, V., and Schuurman, I. (2013). The construction of a 500-million-word  
644 reference corpus of contemporary written dutch. In *Essential speech and language technology for Dutch*,  
645 pages 219–247. Springer, Berlin, Heidelberg.
- 646 O’Sullivan, J. A., Power, A. J., Mesgarani, N., Rajaram, S., Foxe, J. J., Shinn-Cunningham, B. G., Slaney,

- 647 M., Shamma, S. A., and Lalor, E. C. (2015). Attentional selection in a cocktail party environment can be  
648 decoded from single-trial eeg. *Cerebral cortex*, 25(7):1697–1706.
- 649 Pulvermüller, F., Lutzenberger, W., and Birbaumer, N. (1995). Electrocortical distinction of vocabulary  
650 types. *Electroencephalography and clinical Neurophysiology*, 94(5):357–370.
- 651 R Core Team (2020). *R: A Language and Environment for Statistical Computing*. R Foundation for Statistical  
652 Computing, Vienna, Austria.
- 653 Roularta Consortium (2011). Roularta corpus.
- 654 Sanders, L. D. and Neville, H. J. (2003). An erp study of continuous speech processing: I. segmentation,  
655 semantics, and syntax in native speakers. *Cognitive Brain Research*, 15(3):228–240.
- 656 Sanders, L. D., Newport, E. L., and Neville, H. J. (2002). Segmenting nonsense: an event-related potential  
657 index of perceived onsets in continuous speech. *Nature neuroscience*, 5(7):700–703.
- 658 Slaney, M. (1998). Auditory toolbox. *Interval Research Corporation, Tech. Rep.*, 10(1998).
- 659 Somers, B., Francart, T., and Bertrand, A. (2018). A generic eeg artifact removal algorithm based on the  
660 multi-channel wiener filter. *Journal of neural engineering*, 15(3):036007.
- 661 Tierney, A. and Kraus, N. (2014). Neural entrainment to the rhythmic structure of music. *Journal of*  
662 *Cognitive Neuroscience*, 27(2):400–408.
- 663 Tulkens, S., Emmery, C., and Daelemans, W. (2016). Evaluating unsupervised dutch word embeddings as a  
664 linguistic resource. *arXiv preprint arXiv:1607.00225*.
- 665 Vanthornhout, J., Decruy, L., Wouters, J., Simon, J. Z., and Francart, T. (2018). Speech intelligibility  
666 predicted from neural entrainment of the speech envelope. *Journal of the Association for Research in*  
667 *Otolaryngology*, 19(2):181–191.
- 668 Verwimp, L., Van hamme, H., and Wambacq, P. (2019). Tf-lm: Tensorflow-based language modeling toolkit.  
669 In <http://www.lrec-conf.org/proceedings/lrec2018/index.html>, pages 2968–2973. Proceedings LREC.
- 670 Voeten, C. C. (2020). *buildmer: Stepwise Elimination and Term Reordering for Mixed-Effects Regression*. R  
671 package version 1.6.
- 672 Weissbart, H., Kandylaki, K. D., and Reichenbach, T. (2020). Cortical tracking of surprisal during continuous  
673 speech comprehension. *Journal of Cognitive Neuroscience*, 32(1):155–166.
- 674 Wikipedia (2015). Corpus of a wikipedia dump; 2015.07.03 dump.

675 Willems, R. M., Frank, S. L., Nijhof, A. D., Hagoort, P., and Van den Bosch, A. (2016). Prediction during  
676 natural language comprehension. *Cerebral Cortex*, 26(6):2506–2516.

677 **Appendix**

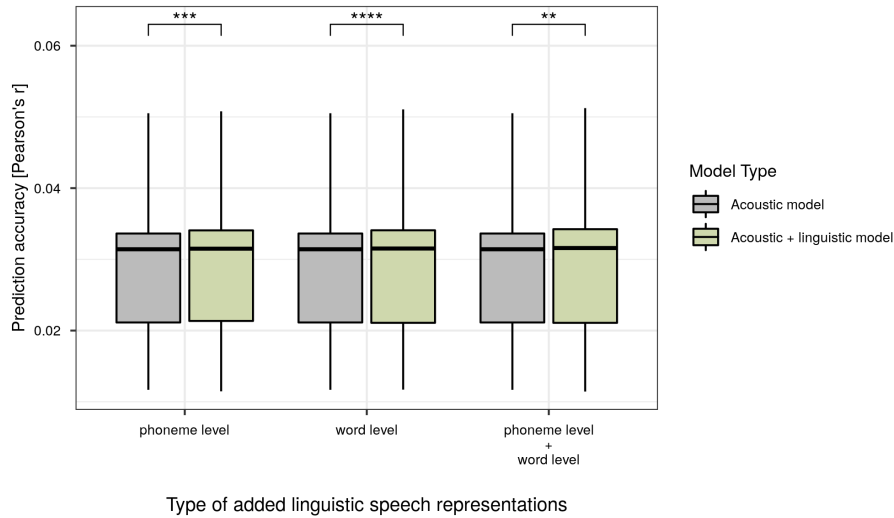

Figure A.1: Comparison of the prediction accuracies of the acoustic model (grey) and the acoustic model with linguistic predictors (green). The acoustic model contains all acoustic and linguistic segmentation speech representations.

Table A.1: Intersections of the significant time windows of phoneme surprisal and cohort entropy with the p-value of the interaction term between sensor and speech representation obtained via the method proposed by McCarthy and Wood (1985) for a central channel selection.

| Time window (ms) | P-value of interaction |
|------------------|------------------------|
| 164-273          | p=0.309                |
| 414-562          | p=0.035                |
| 586-609          | p=0.847                |
| 703-843          | p=0.980                |

Table A.2: Intersections of the significant time windows of phoneme surprisal and cohort entropy with the p-value of the interaction term between sensor and speech representation obtained via the method proposed by McCarthy and Wood (1985) for a frontal channel selection.

| Time window (ms) | P-value of interaction |
|------------------|------------------------|
| 102-164          | p=0.263                |
| 367-461          | p=0.634                |
| 773-914          | p=0.994                |

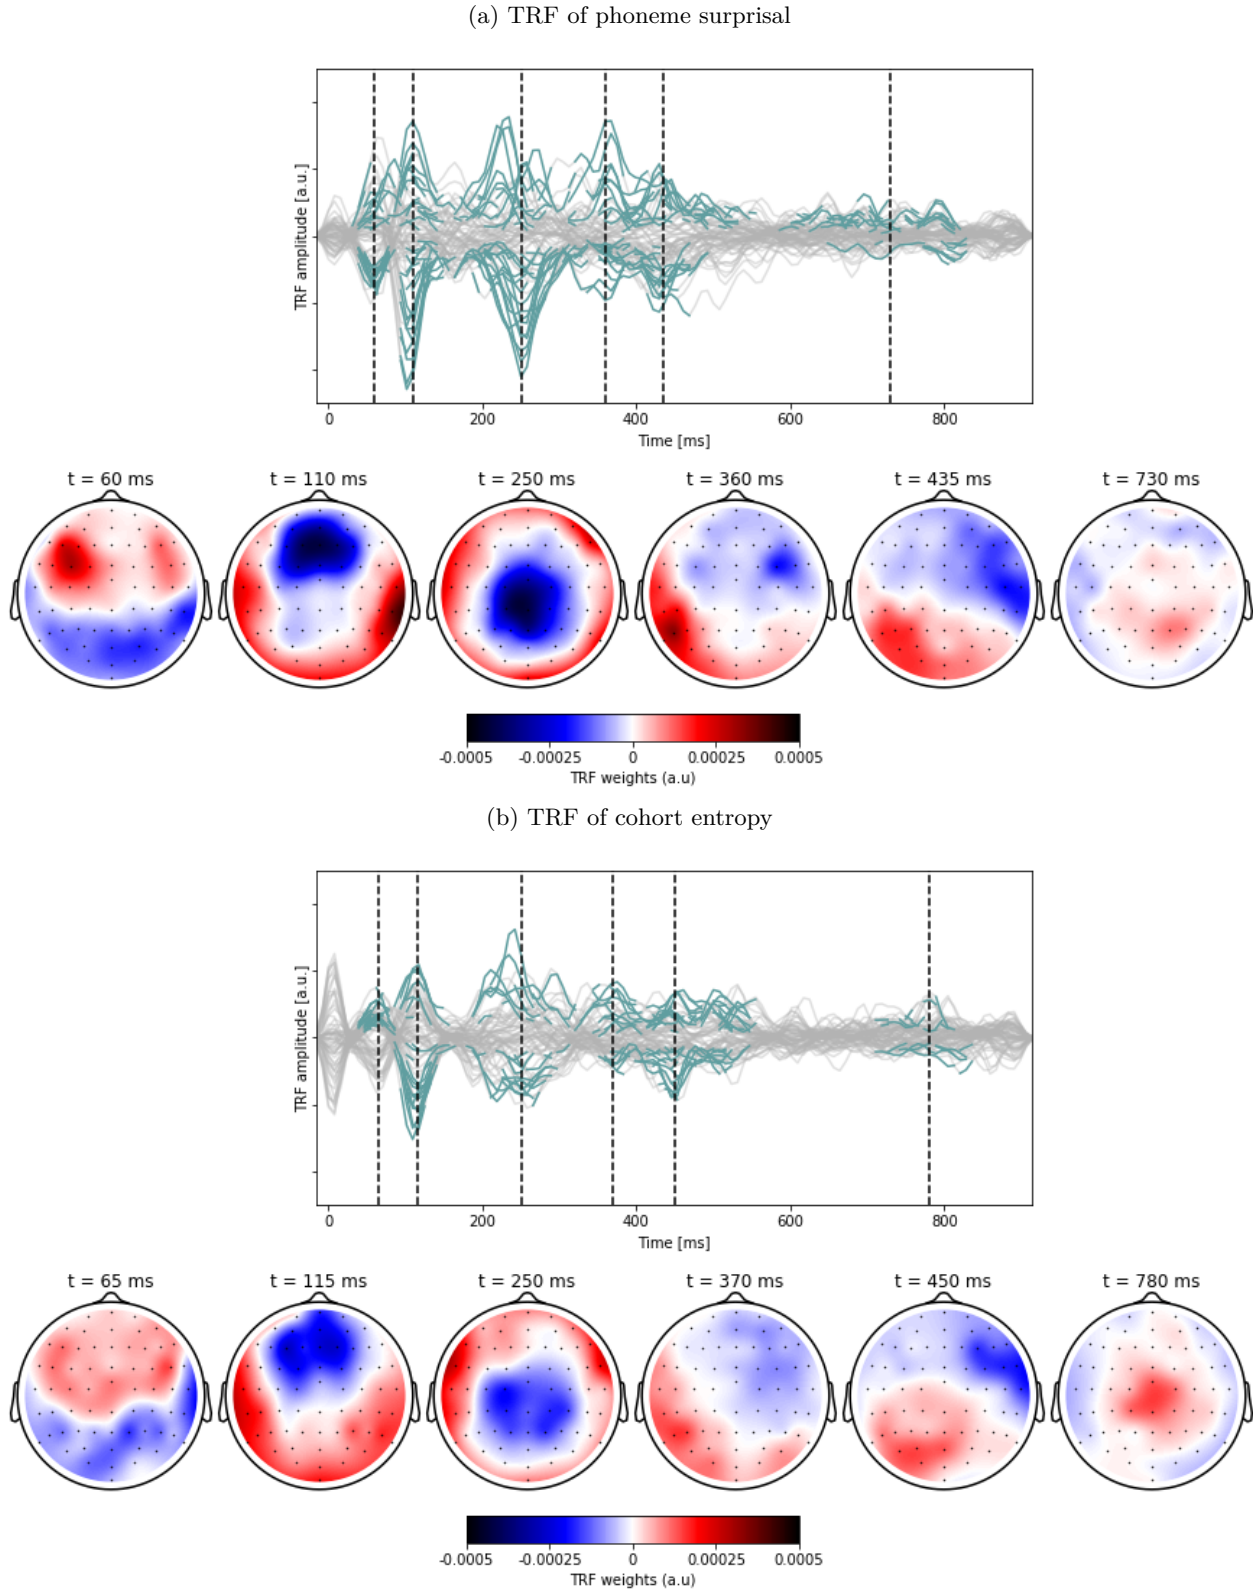

Figure A.2: The average TRF to the linguistic predictors at the phoneme level. The channel responses over time which are significantly different from zero, are annotated in blue. The insets below show the topographic responses at the peak latencies annotated with the dashed vertical lines.



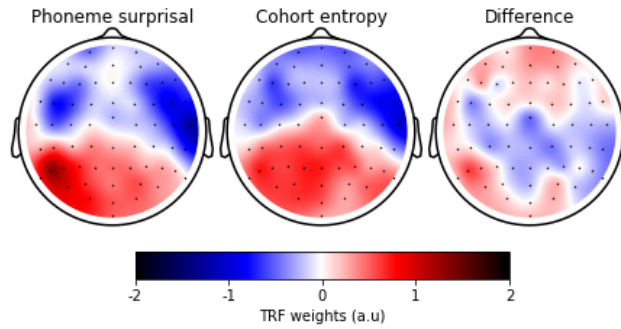

Figure A.3: The normalized TRF-weights averaged across participants within the time window 414 ms to 562 ms for phoneme surprisal (left) and cohort entropy (middle) and the resulting difference (left).

Table A.3: Intersections of the significant time windows of word surprisal and word frequency with the p-value of the interaction term between sensor and speech representation obtained via the method proposed by McCarthy and Wood (1985) for a central channel selection.

| Time window (ms) | P-value of interaction |
|------------------|------------------------|
| 242-484          | p<0.001                |
| 766-788          | p=0.201                |
| 883-914          | p=0.287                |

Table A.4: Intersections of the significant time windows of word surprisal and word frequency with the p-value of the interaction term between sensor and speech representation obtained via the method proposed by McCarthy and Wood (1985) for a frontal channel selection.

| Time window (ms) | P-value of interaction |
|------------------|------------------------|
| 0-62             | p<0.001                |
| 305-351          | p=0.058                |
| 578-679          | p=0.458                |

Table A.5: Time windows of prominent peaks in the response to content and function words with the p-value of the interaction term between sensor and speech representation obtained via the method proposed by McCarthy and Wood (1985).

| Time window (ms) | P-value of interaction |
|------------------|------------------------|
| -16-86           | p<0.001                |
| 148-164          | p<0.001                |
| 227-25           | p<0.001                |
| 297-375          | p<0.001                |
| 523-547          | p=0.436                |

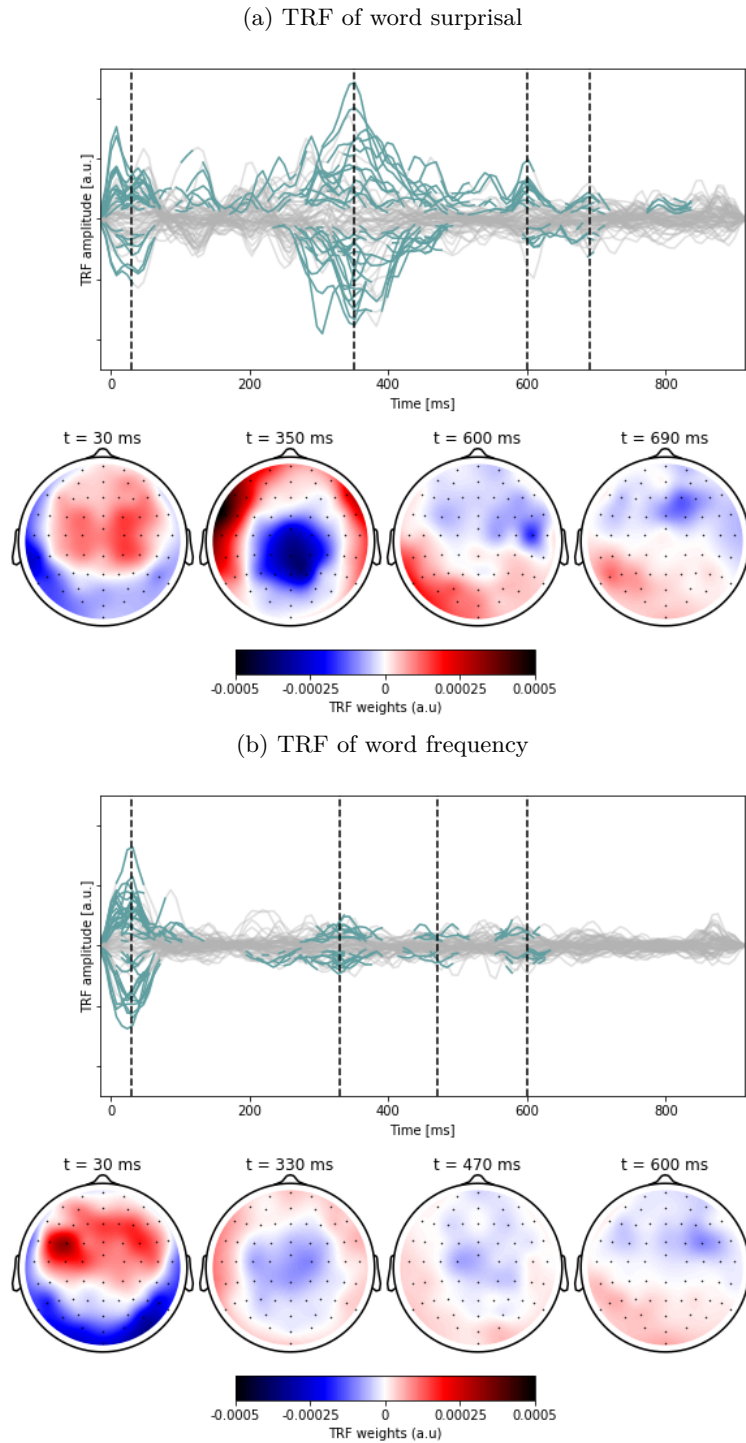

Figure A.4: The average TRF to the linguistic predictors at the word level. The channel responses over time which are significantly different from zero, are annotated in blue. The insets below show the topographic responses at the peak latencies annotated with the dashed vertical lines.

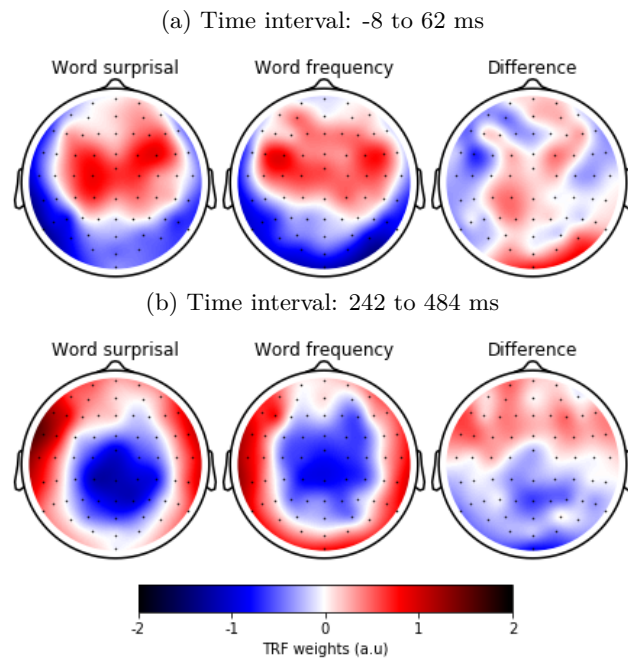

Figure A.5: The normalized TRF-weights averaged across participants within 2 different time windows for word surprisal (left) and word frequency (middle) and the resulting difference (left).

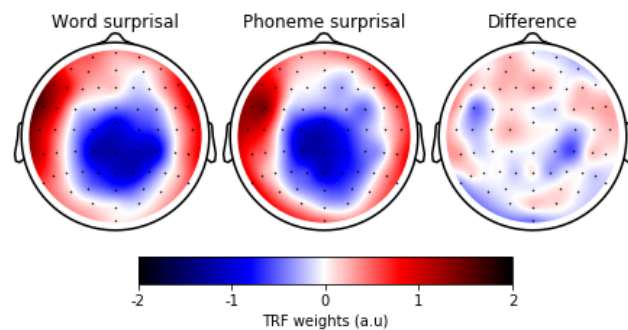

Figure A.6: The normalized TRF-weights averaged across participants within the time window 242 ms to 531 ms for word surprisal (left), 164 ms to 343 ms for phoneme surprisal (middle) and the resulting difference (left).

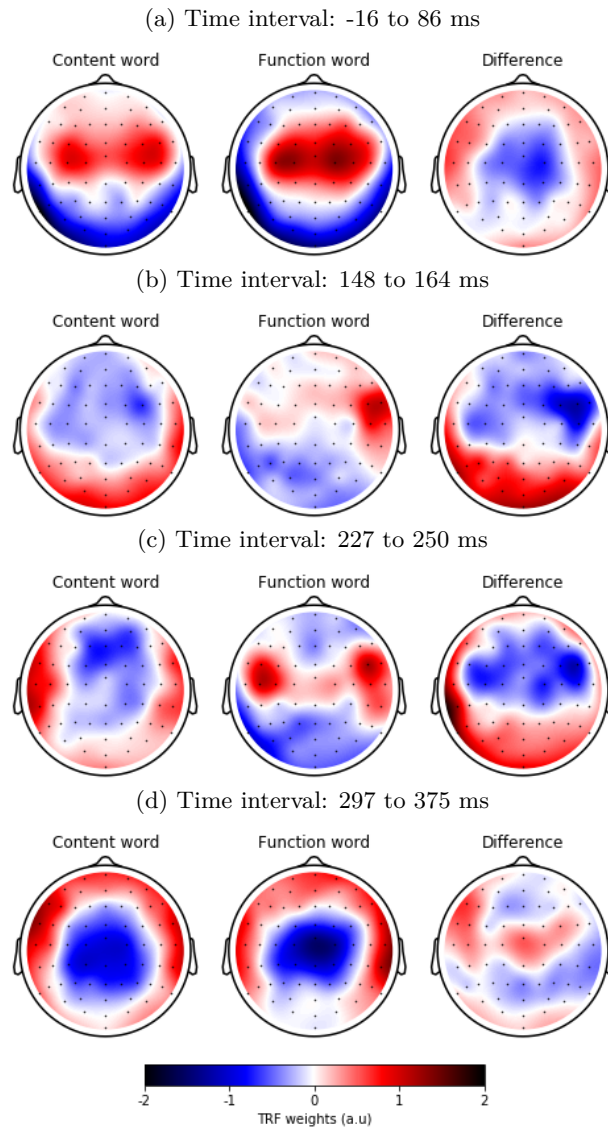

Figure A.7: The normalized TRF-weights averaged across participants within 4 different time windows for the response to a content word (left) and a function word (middle) and its resulting difference (left).

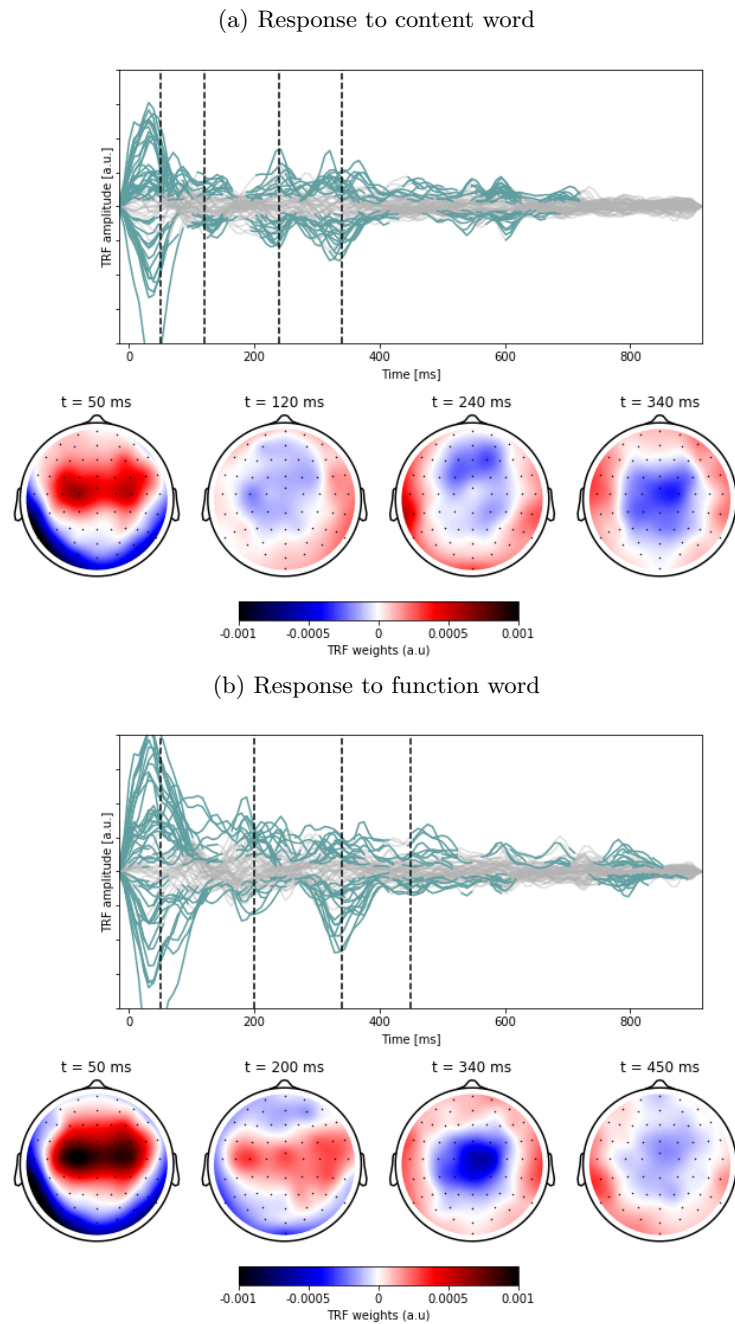

Figure A.8: The average neural response to a content (top) and function word (below). The channel responses over time which are significantly different from zero, are annotated in blue. The insets below show the topographic responses at the peak latencies annotated with the dashed vertical lines.

(a) Response to a function word which the next word followed earlier than 300 ms

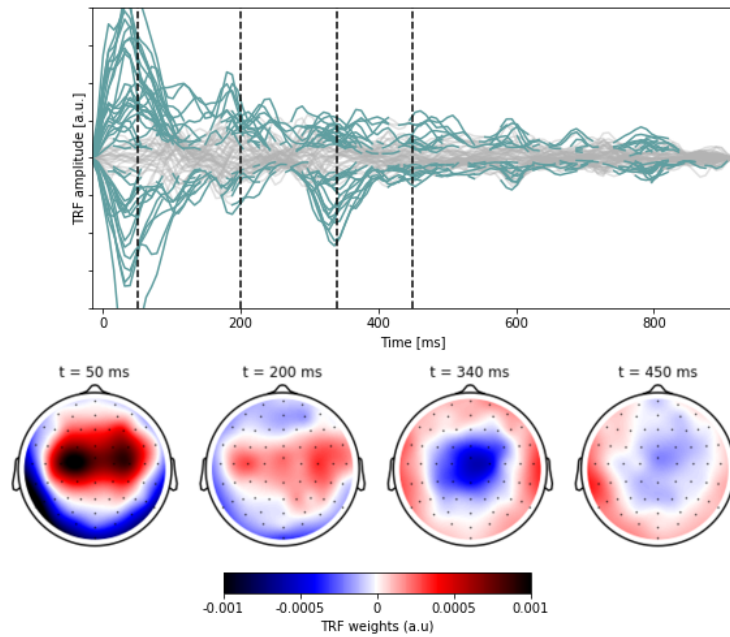

(b) Response to a function word which the next word followed later than 300 ms

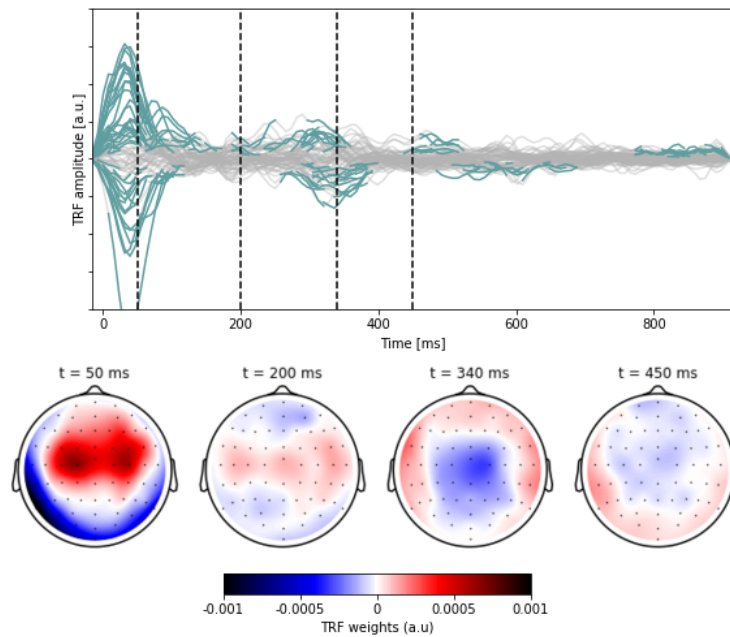

Figure A.9: The average neural response to a function word which the next word followed earlier than 300 ms (top) and later than 300 ms (below). The channel responses over time which are significantly different from zero, are annotated in blue. The insets below show the topographic responses at the peak latencies annotated with the dashed vertical lines.

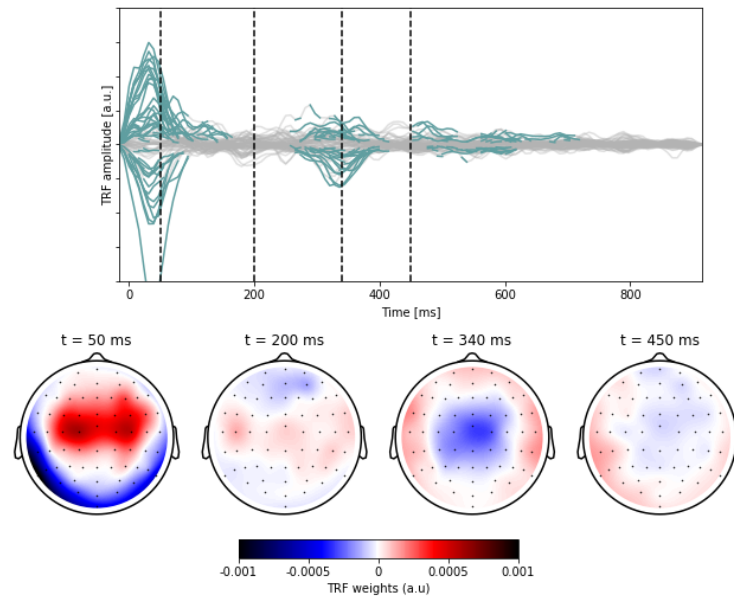

Figure A.10: The average neural response to word onsets. The channel responses over time which are significantly different from zero, are annotated in blue. The insets below show the topographic responses at the peak latencies annotated with the dashed vertical lines.

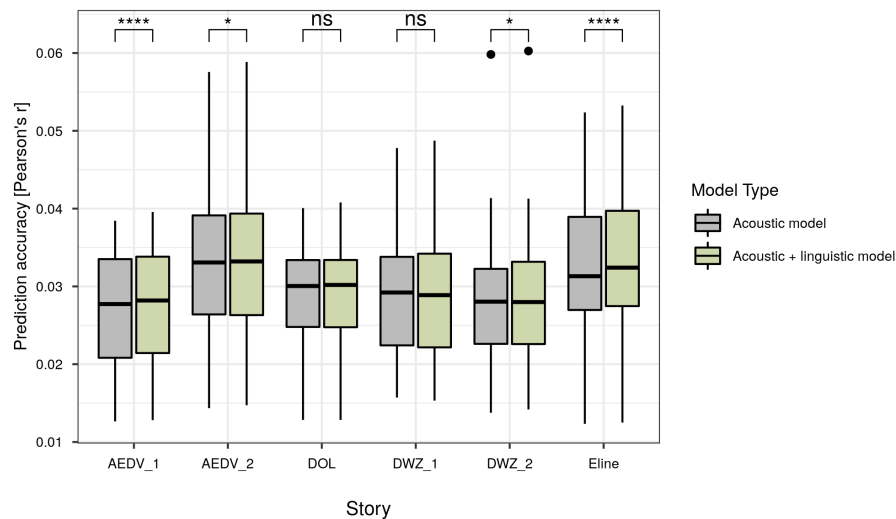

Figure A.11: Comparison of the prediction accuracies of the acoustic model (grey) and the acoustic model with linguistic predictors (green) for each story.
